# 1 **Microtubule-associated proteins promote microtubule generation in** 2 **the absence of $\gamma$ -tubulin in human colon cancer cells**

3  
4  
5 Kenta Tsuchiya<sup>1</sup> and Gohta Goshima<sup>1,2\*</sup>

6  
7 <sup>1</sup>Division of Biological Science, Graduate School of Science, Nagoya University, Furo-  
8 cho, Chikusa-ku, Nagoya, Aichi 464-8602, Japan

9 <sup>2</sup>Sugashima Marine Biological Laboratory, Graduate School of Science, Nagoya  
10 University, Sugashima, 429-63, Toba 517-0004, Japan

11  
12 \*Correspondence should be addressed to [goshima@bio.nagoya-u.ac.jp](mailto:goshima@bio.nagoya-u.ac.jp)  
13 Phone: +81 599-34-2216  
14  
15

## 16 **Abstract**

17  $\gamma$ -Tubulin complex acts as the predominant microtubule (MT) nucleator that initiates MT  
18 formation and is therefore an essential factor for cell proliferation. Nonetheless, cellular  
19 MTs are formed after experimental depletion of the  $\gamma$ -tubulin complex, suggesting that  
20 cells possess other factors that drive MT nucleation. Here, by combining gene knockout,  
21 auxin-inducible degron, RNA interference, MT depolymerisation/regrowth assay, and  
22 live microscopy, we identified four microtubule-associated proteins (MAPs), ch-TOG,  
23 CLASP1, CAMSAPs, and TPX2, which are involved in  $\gamma$ -tubulin-independent MT  
24 generation in human colon cancer cells. In the mitotic MT regrowth assay, nucleated MTs  
25 organised non-centriolar MT organising centres (ncMTOCs) in the absence of  $\gamma$ -tubulin.  
26 Depletion of CLASP1 or TPX2 substantially delayed ncMTOC formation, suggesting that  
27 they promote MT nucleation in the absence of  $\gamma$ -tubulin. In contrast, depletion of  
28 CAMSAPs or ch-TOG did not affect the timing of ncMTOC appearance. CLASP1 also  
29 accelerates  $\gamma$ -tubulin-independent MT regrowth during interphase. Thus, MT generation  
30 can be promoted by MAPs without the  $\gamma$ -tubulin template.  
31

## 32 **Introduction**

33 Microtubules (MTs) are cytoskeletal filaments essential for various cellular activities,  
34 such as chromosome segregation, cell division, cell polarisation, and organelle transport.  
35 MTs are formed via the polymerisation of  $\alpha$ - and  $\beta$ -tubulin heterodimers. MT formation  
36 begins with MT nucleation, where tubulin dimers assemble into oligomers and form a  
37 ‘critical nucleus’ (Roostalu and Surrey, 2017). The MT nucleus then recruits more tubulin  
38 dimers, leading to persistent MT polymerisation or growth, until the MTs pause or start  
39 depolymerisation. This entire reaction can take place solely with a high concentration of  
40 pure tubulin with GTP in the test tube. However, the initial nucleation step is assumed to  
41 be a challenging process *in vivo*, where the tubulin amount is limited and some factors  
42 destabilise MTs. The discovery of another class of tubulin,  $\gamma$ -tubulin, and its associated  
43 subunits called GCPs, provided key insights into how eukaryotic cells efficiently nucleate  
44 MTs (Liu et al., 2021; Oakley and Oakley, 1989; Tovey and Conduit, 2018). The ring-  
45 shaped  $\gamma$ -tubulin complex ( $\gamma$ -TuRC) serves as the structural template for the initial tubulin  
46 assembly, thereby accelerating the initial lag phase (Zheng et al., 1995). However, the  $\gamma$ -

47 TuRC alone is not an efficient MT nucleator, and efficient nucleation requires association  
48 with other proteins, such as CDK5RAP2, XMAP215/ch-TOG, TPX2, and augmin  
49 (Alfaro-Aco et al., 2020; Choi et al., 2010; Consolati et al., 2020; Flor-Parra et al., 2018;  
50 Tariq et al., 2020; Thawani et al., 2018). Some of these activators likely alter the  
51 conformation of  $\gamma$ -TuRC to better fit the ends of MT protofilaments (Consolati et al.,  
52 2020; Liu et al., 2020; Wieczorek et al., 2020), whereas others cooperate with  $\gamma$ -TuRC  
53 (Consolati et al., 2020; Flor-Parra et al., 2018; King et al., 2020; Thawani et al., 2018). It  
54 is now well established that  $\gamma$ -TuRC, with its activators, is the dominant MT nucleator in  
55 most eukaryotic cell types. However, there remains another enigma regarding  $\gamma$ -TuRC:  
56 cellular MTs are still present after  $\gamma$ -TuRC depletion or perturbation in every system  
57 examined to date, including inhibitor treatment and RNA interference (RNAi) in animals  
58 and plants (Chinen et al., 2015; Hannak et al., 2002; Nakaoka et al., 2015; Rogers et al.,  
59 2008; Sallee et al., 2018; Wang et al., 2015). For instance, RNAi or tissue-specific  
60 degradation system reportedly depleted >90% of  $\gamma$ -TuRC from *C. elegans* cells, yet MTs  
61 were still nucleated from the centrosome in the early embryo (Hannak et al., 2002) or  
62 acentrosomal MTOCs in intestinal epithelial cells (Sallee et al., 2018).

63 This phenomenon is possibly due to the sufficient amount of residual  $\gamma$ -TuRC for a  
64 certain degree of MT nucleation. This is not an ignorable caveat. Recent reconstitution  
65 studies indicate that a partial complex with eight  $\gamma$ -tubulin subunits is as potent as the full  
66 complex of 14  $\gamma$ -tubulin in facilitating MT nucleation (Wieczorek et al., 2021). To  
67 establish the dispensability of  $\gamma$ -tubulin, the best approach is to genetically delete  $\gamma$ -  
68 tubulin. However, because  $\gamma$ -tubulin is an essential gene for mitosis in every cell type, it  
69 has been impossible to establish a stable cell line in which  $\gamma$ -tubulin genes are deleted. In  
70 one study, CRISPR-based genome editing transiently created  $\gamma$ -tubulin gene-deleted cells,  
71 which failed to assemble functional spindles (McKinley and Cheeseman, 2017); however,  
72 the amount of residual  $\gamma$ -tubulin proteins in each cell was unclear. Another possible  
73 explanation for the remaining MTs after  $\gamma$ -tubulin depletion or inhibition is that cells have  
74 other factors that can nucleate MTs independent of  $\gamma$ -tubulin. Indeed, several MT-  
75 associated proteins (MAPs), whose major activity may not be considered MT nucleation,  
76 can promote MT nucleation *in vitro* when mixed with tubulin (Brunet et al., 2004; Imasaki  
77 et al., 2021; King et al., 2020; Roostalu et al., 2015; Slep and Vale, 2007). They are  
78 candidates for  $\gamma$ -tubulin-independent nucleators in cells.

79 The aim of this study was to identify the proteins required for  $\gamma$ -tubulin-independent  
80 MT nucleation in a single cell type in humans. We first verified that MTs can be nucleated  
81 in cells with undetectable levels of  $\gamma$ -tubulin and then searched for the MAPs required for  
82 MT generation under these conditions. Our study suggests that multiple factors, including  
83 CLASP1 and TPX2, are cellular MT nucleators that are normally masked by the dominant  
84  $\gamma$ -TuRC machinery.

85

## 86 **Results**

87

### 88 **MT formation with undetectable levels of $\gamma$ -tubulin**

89 Most previous studies utilised population assays to assess the contribution of  $\gamma$ -  
90 tubulin to MT nucleation, which did not correlate the reduction level of  $\gamma$ -tubulin with  
91 MT nucleation potential at the single-cell level. In this study, one of the two  $\gamma$ -tubulin  
92 genes in humans (*TUBG2*) was knocked out, and the other TubG1 protein was tagged

93 biallelically with mini-auxin-inducible degron (mAID)-mClover (Fig. 1A, S1A, B).  
94 mClover intensity indicated the total  $\gamma$ -tubulin protein level in the cell, whereas mAID  
95 allowed acute degradation of the tagged protein via the proteasome. We selected the  
96 human HCT116 cell line for this study, which is a stable diploid line derived from colon  
97 cancer (Brattain et al., 1981). This cell line is amenable to CRISPR/Cas9-based genome  
98 editing and RNAi, and its mitosis has been studied in our laboratory (Okumura et al.,  
99 2018; Tsuchiya et al., 2021; Tungadi et al., 2017).

100 Prior to studying MT nucleation, we performed a basic characterisation of this cell  
101 line. First, TubG1-mAID-mClover was localised to the centrosome and spindle MTs,  
102 consistent with immunostaining in various human cell lines (Luders et al., 2006) (Fig. 1D,  
103 Movie 1). Second, the mitotic progression ( $31 \pm 8$  min [ $\pm$ SD],  $n = 49$ ; Fig. 1E) was  
104 comparable to that in the control cell line ( $34 \pm 8$  min; Tsuchiya et al., 2021). Finally, we  
105 performed sucrose gradient centrifugation, followed by immunoblotting (Fig. 1B, C). The  
106 results indicated that TubG1-mAID-mClover was assembled into the large  $\gamma$ -TuRC  
107 complex. Given the addition of 14 copies of mAID-mClover tag (each  $\sim 30$  kD), it was  
108 reasonable that the peak of the tagged protein was shifted by one lane to a larger fraction  
109 than endogenous TubG1. A slightly smaller complex was also detected for tagged TubG1  
110 (lane 10 in Fig. 1C); this may be because the tag partially prevents incorporation into the  
111 complete  $\gamma$ -TuRC. Nevertheless, the result is consistent with the observation that  
112 endogenous TubG1 can be completely replaced with TubG1-mAID-mClover in this  
113 human cell line.

114 Upon indole acetic acid (IAA) treatment, cells showed different levels of mClover  
115 signals (as observed using a spinning-disc confocal microscope) owing to varying  
116 degradation levels in interphase and mitosis (Fig. 2A–C). This was confirmed by the  
117 quantification of the mClover signal intensity (Fig. 2D, E). The cells in which we could  
118 not detect residual  $\gamma$ -tubulin signals by manual inspection always returned low signal  
119 values after quantification (coloured pink in the graph). However, the opposite was not  
120 true; the cells with very low signals in quantification did not always represent  $\gamma$ -tubulin-  
121 null based on manual inspection; they included cells with faint punctate mClover signals  
122 at the centrosome, which did not contribute markedly to the total intensity. Therefore, in  
123 the subsequent analysis, we manually inspected the acquired images and selected  
124 “mClover signals undetectable” cells; these cells were closest to  $\gamma$ -tubulin null. The  
125 neighbouring cells with mClover signals served as internal controls. Regardless of the  
126 presence or absence of mClover signals, MTs visualised with SiR-tubulin were present  
127 in every cell during interphase (Fig. 2A). Furthermore, the cells assembled tiny spindles  
128 in mitosis and could not enter anaphase (Fig. 1D, E, Movie 2). These results support the  
129 presence of  $\gamma$ -tubulin-independent MT nucleation during interphase and mitosis.

130

### 131 **MT nucleation in the absence of $\gamma$ -tubulin**

132 To assess MT generation ability without  $\gamma$ -tubulin in living cells, we performed an  
133 MT depolymerisation/regrowth assay, in which MTs were first depolymerised with the  
134 MT drug nocodazole, followed by drug washout (Fig. 3A, Movie 3). The experiments  
135 were mostly performed at 25 °C, as MTs reappeared too quickly after drug washout at  
136 37 °C; MT nucleation took place prior to image acquisition. For normal HCT116 cells,  
137 25 °C is a challenging temperature, as evidenced by the fact that bipolar spindle formation  
138 requires  $> 30$  min (Fig. S2A, B). However, this was compensated for in the regrowth  
139 assay, as the initial tubulin concentration was higher than that in normal cycling cells due

140 to complete MT depolymerisation beforehand. In cells that retained TubG1-mClover  
141 signals (circled yellow), cytoplasmic MTs were observed 10 min after drug washout, with  
142 the centrosome being the most prominent MT organising centre (MTOC) (43 out of 45  
143 cells showed cytoplasmic MT network at 10 min) (Fig. 3B). In contrast, cytoplasmic MTs  
144 were hardly detected until 20–30 min in the absence of  $\gamma$ -tubulin, with no clear MTOCs  
145 (circled red; 33 out of 42 cells showed no cytoplasmic MT networks at 10 min).

146 To further demonstrate that MT nucleation occurs in the absence of  $\gamma$ -TuRC as the  
147 nucleator, we observed the cells undergoing MT regrowth using oblique illumination  
148 fluorescence microscopy, which is sensitive enough to detect a single  $\gamma$ -tubulin complex  
149 containing >10 fluorescent mClover molecules and an occasional MT nucleation event  
150 (Nakaoka et al., 2015). We observed many punctate signals in control cells, each likely  
151 representing a cytoplasmic  $\gamma$ -TuRC near the cell cortex (Fig. 4A, yellow circle). We could  
152 not identify a MT nucleating event from the observed  $\gamma$ -TuRC spots; MT emergence  
153 under these conditions represented MT plus ends grown from the other focal plane. This  
154 was because MT nucleation predominantly occurred at the centrosome, which could not  
155 be localised to the focal plane in this microscopy. In contrast, after degron treatment,  
156 some cells hardly showed punctate signals of mClover, despite the presence of MTs (Fig.  
157 4B, red circle). MTs were generated in the absence of  $\gamma$ -tubulin (i.e. undetectable levels  
158 of mClover signals), albeit more slowly (Fig. 4C). Under these conditions, we  
159 occasionally identified MT nucleating events, in which MT punctae diffused in 2D, which  
160 is an indicator of nucleation rather than plus-end growth from the off-focal plane (Fig.  
161 4D, arrows). Furthermore, we observed at higher frequency the MT loop formation in  
162 which both ends were clearly in the focal plane (Fig. 4B, right, Fig. 4D, bottom right,  
163 Movie 4); the diameter of the loop was  $0.85 \pm 0.26 \mu\text{m}$  ( $\pm$ SD,  $n = 29$ ), which resembles  
164 what has been observed in an *in vitro* MT gliding assay (Liu et al., 2011).

165 To determine whether there is a possible artifactual effect of SiR-tubulin dye on MT  
166 nucleation and growth ability, we compared the timing of MT appearance and MT growth  
167 rate in the presence or absence of SiR-tubulin. To visualise MTs without SiR-tubulin, we  
168 selected and used a cell line in which endogenous ch-TOG was tagged with mCherry (Fig.  
169 S1C, S2C, Movie 1). The data indicate that the effect of SiR-tubulin on MT nucleation  
170 and growth is mild (Fig. S2D, E).

171 Taken together, we concluded that  $\gamma$ -TuRC constitutes the dominant, but not essential,  
172 mechanism of MT nucleation in the interphase cytoplasm.

173

### 174 **ch-TOG, CLASP1, and CAMSAPs are critical for interphase MT generation in the** 175 **absence of $\gamma$ -tubulin**

176 To identify the factors responsible for  $\gamma$ -tubulin-independent nucleation, we  
177 conducted an RNAi screen of 11 candidate genes (or gene family) using the  $\gamma$ -tubulin  
178 degron line (Fig. 5A). The MT regrowth assay was carried out, and the cells that retained  
179 or lacked  $\gamma$ -tubulin-mClover signals were analysed. In the screening, we identified “MT  
180 regrowth” when one or more MTs were detected within 30 min under a spinning-disc  
181 confocal microscope. When  $\gamma$ -tubulin was present, MTs were observed normally in all  
182 RNAi samples. In contrast, we observed that more than half of the  $\gamma$ -tubulin-degraded  
183 cells failed to regrow MTs in 30 min when ch-TOG, CLASP1, or CAMSAP1/2/3 were  
184 depleted by RNAi (Fig. 5B–E). In contrast, depletion of CDK5RAP2 or PCNT had no  
185 effect on  $\gamma$ -tubulin-independent MT generation, although it has been shown to promote

186 cytoplasmic nucleation in the presence of  $\gamma$ -tubulin in other cell types (Choi et al., 2010;  
187 Gavilan et al., 2018; Wu et al., 2016).

188 To confirm and specify the responsible genes, we performed loss-of-function  
189 analyses after generating new cell lines (Fig. 6A–C, Movie 3). The critical contribution  
190 of ch-TOG (*Xenopus* XMAP215 orthologue), best known as MT polymerase (Brouhard  
191 et al., 2008), was confirmed by degron treatment of the line expressing TubG1-mAID-  
192 mClover and ch-TOG-mAID-mCherry (Fig. S1C). When neither signal was observed,  
193 MT regrowth was undetectable for 30 min in >70% of the cells (Fig. 6A, D). The  
194 requirement of AKAP450 (Gavilan et al., 2018; Rivero et al., 2009; Wu et al., 2016) was  
195 excluded from the observation of MT regrowth in their verified knockout (KO) lines (Fig.  
196 6D, S1F, S3A). CLASP proteins are best known as MT stabilisers (Al-Bassam et al.,  
197 2010; Moriwaki and Goshima, 2016; Yu et al., 2016) and are also required for Golgi- and  
198  $\gamma$ -tubulin-dependent MT nucleation in RPE1 cells (Efimov et al., 2007). CLASP1 was  
199 crucial for MT regrowth, as revealed by the generation of a CLASP1-mAID-mCherry  
200 degron line in the background of  $\gamma$ -tubulin degron (Fig. 6B, D, S1D). CAMSAP family  
201 members have been characterised as minus-end stabilisers (Goodwin and Vale, 2010;  
202 Jiang et al., 2014), in which the CAMSAP3 KO line showed normal regrowth of MTs  
203 (Fig. S1G, S3B, C). However, when CAMSAP1 or CAMSAP2 was depleted by RNAi in  
204 the CAMSAP3 KO line, MT regrowth was not observed in >25% of the cells (Fig. 6C,  
205 D, S3D–G). Quantification of MT intensity at 30 min supported these findings (Fig. 6E).  
206 These results indicate that ch-TOG, CLASP1, and CAMSAPs are involved in MT  
207 generation during the interphase of  $\gamma$ -tubulin-depleted cells.

208 An identical assay was performed at 37 °C (Fig. 6F). Even under this more favourable  
209 condition for MT nucleation and growth, we observed a significant delay in MT  
210 nucleation in the absence of  $\gamma$ -tubulin. Unlike at 25 °C, MTs were observed within 30 min  
211 in the majority of cells after co-depletion with ch-TOG or CLASP1. Interestingly,  
212 however, the first appearance of MT was delayed when CLASP1, but not ch-TOG, was  
213 co-depleted with  $\gamma$ -tubulin (Fig. 6F). These results suggest that CLASP1 is involved in  
214 the early stage of MT formation, possibly in the nucleation step, in the absence of  $\gamma$ -  
215 tubulin during interphase.

216

### 217 **No accumulation of ch-TOG and CLASP1 at the $\gamma$ -tubulin-independent nucleation** 218 **site**

219 We investigated the possibility that ch-TOG or CLASP first forms an assembly or  
220 seed, from which MT nucleates and regrows in the absence of  $\gamma$ -tubulin in cells. To this  
221 end, the ch-TOG-mCherry or CLASP1-mCherry constructs, which did not have the AID  
222 tag, were integrated into the TubG1-mClover-mAID/TubG2-KO line, and oblique  
223 illumination fluorescence microscopy was performed after  $\gamma$ -tubulin degradation. We  
224 observed MT nucleation and growth after the drug washout. However, ch-TOG or  
225 CLASP1 was undetectable at the emergence of MTs; they were later visible near the other  
226 end of MTs (Fig. S4). Considering that the SiR-Tubulin dye stains the MT lattice with a  
227 ~10 s delay after actual MT formation (David et al., 2019), it is unlikely that ch-TOG or  
228 CLASP1 was abundantly present at the nucleation site. We concluded that a detectable  
229 level of assembly of ch-TOG or CLASP1 at MT minus ends was not involved in  $\gamma$ -  
230 tubulin-independent MT regrowth.

231

### 232 **$\gamma$ -Tubulin-independent MT nucleation and MTOC formation during prometaphase**

233 Next, we tested the involvement of  $\gamma$ -tubulin in mitotic MT nucleation through MT  
234 depolymerisation and regrowth assay in prometaphase (Movie 5). MTs were  
235 depolymerised by 24 h nocodazole treatment and 4 h incubation on ice (Fig. 7A). In  
236 control cells with  $\gamma$ -tubulin, MTs were undetectable, except for one or two spots (Fig. 7B,  
237 0 min). These most likely reflected centriole-dependent MTs, as MT foci were co-  
238 localised with centrin-2 signals in immunostaining images (Fig. S5A), and the punctate  
239 signal was not observed when centriole was depleted by a total of 12 days of incubation  
240 with centrinone, a chemical inhibitor of the centriole duplication factor Plk4 (Wong et al.,  
241 2015) (Fig. S5B). Upon nocodazole washout and returning the cells to 25 °C, MTs were  
242 immediately and predominantly nucleated from the centrosomes (Fig. 7B). In the cells in  
243 which  $\gamma$ -tubulin was undetectable, MTs similarly disappeared from the mitotic cytoplasm,  
244 retaining one or two punctate signals at the centriole (Fig. 7C, 0 min). Upon nocodazole  
245 washout, MT regrowth was observed, albeit more slowly, in the absence of  $\gamma$ -tubulin  
246 signals (Fig. 7C, 20–30 min). Impaired regrowth was consistent with the results of a  
247 previous study in which a  $\gamma$ -TuRC component was depleted in HeLa cells (Luders et al.,  
248 2006). Interestingly, in addition to centriolar MTOCs (blue arrow at 6 m 30 s), non-  
249 centriolar MTOCs (ncMTOCs) appeared in HCT116 cells, from which MTs later  
250 emanated radially (Fig. 7C, right, green arrows). These MTOCs did not have detectable  
251  $\gamma$ -tubulin signals, indicating that MTs are nucleated independent of  $\gamma$ -tubulin or pre-  
252 existing MTs. We confirmed that SiR-tubulin staining had negligible impact, as  
253 ncMTOCs (visualised by TPX2-mCherry) appeared at similar times and numbers with or  
254 without SiR-tubulin staining (Fig. S5C–E). Thus,  $\gamma$ -tubulin is not essential for MT  
255 nucleation in prometaphase.

256

### 257 **TPX2 and CLASP1 promote mitotic MTOC formation, whereas ch-TOG is critical** 258 **for mitotic MT growth, in the absence of $\gamma$ -tubulin**

259 ncMTOC is formed through MT nucleation, initial growth, stabilisation, and  
260 clustering. We investigated the impact of ch-TOG, CAMSAPs, or CLASP1 depletion on  
261 ncMTOC formation in the absence of  $\gamma$ -tubulin.

262 First, in the absence of ch-TOG alone, ncMTOCs that were clearly separated from  
263 centrioles were observed in ~50% of the cells, probably because centrosomal MT growth  
264 was suppressed and tubulins were available for other MTOC formation (Fig. S5F, I).  
265 ncMTOC was also observed in CLASP1 knockdown; however, centrosomal MTOCs  
266 were dominant over ncMTOCs in this case (Fig. S5G, I). In both cases, MT regrowth  
267 from MTOCs was not suppressed (Fig. S5J).

268 Next, we conducted a regrowth assay after co-depletion with  $\gamma$ -tubulin. MT  
269 depolymerisation removed most MTs, except one or two punctate centriolar signals,  
270 similar to control or single  $\gamma$ -tubulin-depleted cells (Fig. 7D, E, 0 min). In *C. elegans*, co-  
271 depletion of  $\gamma$ -tubulin and the ch-TOG orthologue does not result in additional loss of MT  
272 regrowth in mitotic cells (Hannak et al., 2002). However, when  $\gamma$ -tubulin and ch-TOG  
273 were co-depleted, mitotic MT formation was severely suppressed, consistent with the  
274 results of the interphase (Fig. 7D). Interestingly, the initial ncMTOC formation was not  
275 substantially affected, indicating that MT nucleation occurred, but the subsequent growth  
276 was impaired (Fig. 7D, green arrows, 7G). Similarly, depletion of CAMSAPs did not  
277 affect the timing of ncMTOC formation (Fig. 7G). In contrast, after depletion of CLASP1,  
278 the appearance of ncMTOCs was dramatically delayed (Fig. 7E, G). These results suggest

279 that ch-TOG is essential for MT growth, but not the initial nucleation step, whereas  
280 CLASP1 contributes to ncMTOC formation in the absence of  $\gamma$ -tubulin.

281 TPX2 plays a role in non-centrosomal MT formation during mitosis in multiple cell  
282 lines (Gruss et al., 2002). In the MT regrowth assay using LLC-PK1 and HeLa cells,  
283 TPX2 was found to be responsible for non-centriolar MT formation in the presence of  $\gamma$ -  
284 tubulin (Cavazza et al., 2016; Katayama et al., 2008; Tulu et al., 2006). We reasoned that  
285 this protein might also contribute to ncMTOC formation in the absence of  $\gamma$ -tubulin. We  
286 first selected the degron line (Fig. S1E) and performed the mitotic MT  
287 depolymerisation/regrowth assay in the presence of  $\gamma$ -tubulin. Similar to the ch-TOG  
288 degron, ncMTOCs were observed in ~50% of the cells and MTs regrew from the MTOCs  
289 (Fig. S5H–J). This is somewhat different from what has been observed in other studies  
290 using different cell lines; in our HCT116 cells, TPX2 was dispensable for ncMTOC  
291 formation. To test the contribution of TPX2 in the absence of  $\gamma$ -tubulin, we selected a  
292 double-degron line of TPX2 and  $\gamma$ -tubulin, and furthermore, combined TPX2 RNAi with  
293  $\gamma$ -tubulin single or CLASP1/ $\gamma$ -tubulin double degrons. We observed a delay in the  
294 appearance of ncMTOCs in either case, indicating that TPX2 promotes ncMTOC  
295 formation (Fig. 7F, G). However, ncMTOCs were eventually formed in >50% of the cells  
296 in either sample, suggesting that other unknown factors might also nucleate MTs in the  
297 absence of  $\gamma$ -tubulin during mitosis.

298

### 299 **Roles of Aurora and Plk1 kinases**

300 Three mitotic kinases have been implicated in mitotic MT generation in previous  
301 studies: Plk1/Polo (Cavazza et al., 2016) and Aurora A at the centrosome (Katayama et  
302 al., 2008; Magnaghi-Jaulin et al., 2019), and Aurora B in chromosome-proximal regions  
303 independent of the centrosome (Carmena et al., 2012). In *C. elegans*, centrosomal MT  
304 generation was additively suppressed by depleting  $\gamma$ -tubulin and Aurora A (Motegi et al.,  
305 2006). We tested the contribution of these kinases to  $\gamma$ -tubulin-independent MT regrowth  
306 in prometaphase by preventing their kinase activity with specific inhibitors in  $\gamma$ -tubulin-  
307 depleted cells (Fig. 8A).

308 When the Plk1 inhibitor BI2536 was supplied, ncMTOC formed at normal timing,  
309 similar to the control  $\gamma$ -tubulin single-depleted cells (Fig. 8B, C, F). In contrast, the  
310 inhibition of Aurora B inhibitor by ZM447439 or Aurora A kinase by alisertib delayed  
311 ncMTOC formation in the absence of  $\gamma$ -tubulin (Fig. 8D–F). The effect of Aurora B was  
312 reproduced by RNAi knockdown of Aurora B. Aurora A and B may be partly involved  
313 in non-centriolar MT nucleation in the absence of  $\gamma$ -tubulin.

314

## 315 **Discussion**

316

### 317 **MT nucleation in the absence of $\gamma$ -tubulin**

318 The  $\gamma$ -TuRC is the dominant and arguably the only established cellular MT nucleator  
319 in a wide variety of cells. However, experimental perturbation of  $\gamma$ -TuRC in various cell  
320 types has never led to a complete loss of cellular MTs. Using a single cell-based assay  
321 that monitors both MTs and endogenous  $\gamma$ -tubulin, we unambiguously demonstrated that  
322 MTs could be nucleated in the absence of  $\gamma$ -TuRC in human colon cancer cells.

323 Our functional analysis suggested a possible involvement of MAPs in nucleation.  
324 The mitotic MT regrowth assay provided valuable information about non- $\gamma$ -tubulin MT  
325 nucleators, as ncMTOC was visible in almost all cells when  $\gamma$ -tubulin was depleted. The

326 data indicated that TPX2 and CLASP1 contribute to MTOC formation. In *Xenopus* egg  
327 extracts and by sophisticated *in vitro* reconstitution, TPX2 was shown to activate augmin-  
328 and  $\gamma$ -tubulin-dependent branching nucleation (Alfaro-Aco et al., 2020) and promote  
329 template-based nucleation (Wieczorek et al., 2015). Our data suggest that TPX2 not only  
330 stimulates the  $\gamma$ -tubulin-dependent process but also potentiates template-free MT  
331 nucleation independent of  $\gamma$ -tubulin in the cell. This is consistent with the finding that  
332 recombinant TPX2 can promote MT nucleation *in vitro* (Brunet et al., 2004; Gruss et al.,  
333 2002; Roostalu et al., 2015). From *in vitro* studies, CLASP1 is best known as a MT  
334 stabiliser acting on the MT plus ends and the lattice; it inhibits MT catastrophe and  
335 promotes rescue and pausing (Al-Bassam et al., 2010; Moriwaki and Goshima, 2016; Yu  
336 et al., 2016). In mitosis, the kinetochore function of CLASP1 has been extensively  
337 analysed; however, to our knowledge, the MT nucleation functions have not been  
338 extensively discussed (Logarinho et al., 2012; Maffini et al., 2009). CLASPs are known  
339 to promote Golgi-mediated MT nucleation during the interphase (Efimov et al., 2007).  
340 This function involves AKAP450 and  $\gamma$ -tubulin and is therefore considered to promote  $\gamma$ -  
341 tubulin-dependent nucleation (Efimov et al., 2007; Gavilan et al., 2018; Rivero et al.,  
342 2009; Wu et al., 2016). It is possible that CLASP1 binds to tubulins and MTs, contributing  
343 to the formation of the critical nucleus independent of  $\gamma$ -tubulin. However, because  
344 MTOC formation requires not only MT nucleation but also initial growth, stabilisation,  
345 and clustering, it cannot be ruled out that TPX2 and CLASP1 regulate the latter three  
346 processes.

347  $\gamma$ -Tubulin-independent ncMTOC formation was observed in the absence of ch-TOG  
348 or CAMSAPs during prometaphase, suggesting that they are not essential for mitotic MT  
349 nucleation. MT growth from these ncMTOCs was also observed frequently in the absence  
350 of CAMSAPs. In contrast, MT growth from both centriolar and ncMTOCs was inhibited  
351 in the absence of ch-TOG and  $\gamma$ -tubulin. We interpret that ch-TOG is dispensable for  
352 ncMT nucleation, at least in the presence of CLASP1 and TPX2, but is critical for MT  
353 polymerisation, which is consistent with the established role of ch-TOG as the MT  
354 polymerase. Regarding centriolar MTOCs, an intriguing possibility is that ch-TOG  
355 catalyses centriole-based MT nucleation, independent of  $\gamma$ -tubulin. This is consistent with  
356 the proposal on *C. elegans* centrosomes, where the ch-TOG homologue is recruited and  
357 concentrates tubulin for nucleation (Woodruff et al., 2017). However, we cannot exclude  
358 the possibility that ch-TOG catalyses plus-end polymerisation from nocodazole-resistant  
359 MTs at the centriole.

360 ch-TOG, CAMSAPs, and CLASP1 were important during  $\gamma$ -tubulin-independent MT  
361 generation in the interphase. Interestingly, the assay conducted at 37 °C distinguished the  
362 phenotype of ch-TOG and CLASP1, which is a favourable condition for tubulin to  
363 nucleate and polymerise MTs; MT appearance was delayed specifically in the absence of  
364 CLASP1, consistent with the mitosis results. Thus, CLASP1 might be considered  
365 involved in the nucleation step, whereas ch-TOG is more critical in MT polymerisation  
366 in this cell line. The specific role of CAMSAPs remains unclear, as it is required for MT  
367 minus-end stabilisation (Jiang et al., 2014) and might also drive nucleation (Imasaki et  
368 al., 2021). In *C. elegans*, the CAMSAP homolog promotes the assembly of non-  
369 centrosomal MT arrays in parallel with  $\gamma$ -tubulin (Wang et al., 2015).

370 Are there other factors redundant with CLASP1 and TPX2 for nucleation? Our  
371 protein-depletion experiments did not provide all-or-none results. Most notably, we still  
372 observed ncMTOCs in ~30% of the cells after the depletion of  $\gamma$ -tubulin, CLASP1, and



373 TPX2. This might reflect the incomplete depletion of target proteins by AID and RNAi.  
374 Alternatively, other MT nucleation factors may also exist. In any case, our data indicate  
375 that MT nucleation can be promoted by multiple MAPs in human cells: CLASP1 and  
376 TPX2 at the minimum and possibly more.

377 The mechanism by which CLASP1 or TPX2 promotes nucleation at the molecular  
378 level remains unclear. Our imaging suggests that CLASP1 does not form clusters large  
379 enough to be visualised by oblique illumination fluorescence microscopy. Thus, the  
380 mechanism would be fundamentally different from  $\gamma$ -tubulin-mediated nucleation, where  
381 the ring arrangement of 13  $\gamma$ -tubulin molecules drives nucleation. These MAPs may  
382 enhance the longitudinal and lateral contact between tubulins (Roostalu and Surrey, 2017).  
383 Regarding TPX2, phase-separated condensates might act as the tubulin concentrator and  
384 thereby the MT nucleator (King and Petry, 2020). Furthermore, an interesting *in vitro*  
385 study has been published recently, in which the critical nucleus was visualised by electron  
386 microscopy (Ayukawa et al., 2021). In their model, the nucleus was characterised by  
387 straight tubulin oligomers, which are different from curved tubulin dimers in solution.  
388 Provided that this model is correct, TPX2 and CLASP might be considered to convert the  
389 curved structure to straight via binding. This is a testable hypothesis *in vitro*.

390

### 391 **Does $\gamma$ -tubulin-independent nucleation take place in the presence of $\gamma$ -tubulin?**

392  $\gamma$ -Tubulin-dependent nucleation at the centrosome is predominant in the HCT116 cell line,  
393 and therefore, this study could not determine whether  $\gamma$ -tubulin-independent nucleation  
394 occurs in normal HCT116 cells. However, a few reports, besides that of a simple mutant  
395 analysis, show that the  $\gamma$ -tubulin-independent mechanism is operating and perhaps  
396 important in MT generation in other cell types (Roostalu and Surrey, 2017). One system  
397 is the protonemal tissue of the moss *Physcomitrium patens* in which oblique illumination  
398 fluorescence microscopy was applied, and the  $\gamma$ -tubulin complex and MTs could be  
399 simultaneously observed (Nakaoka et al., 2015). While 90% of the nucleating MTs had  
400  $\gamma$ -tubulin signals at the minus ends, no signals were identified in the other 10% of wild-  
401 type cells. The stability of these MTs was explained by the identification of the plant-  
402 specific minus-end binding and stabilising protein Spiral2 (Leong et al., 2018). Another  
403 notable system is the non-centrosomal fat body cell in *Drosophila*, where  $\gamma$ -tubulin is  
404 dispensable for perinuclear MTOC formation, despite being localised at the perinuclear  
405 region with the activators (Zheng et al., 2020). In these cells, MTs are generated by  
406 CAMSAP and ninein, which recruit ch-TOG. These MTs play critical roles in nuclear  
407 positioning. However, single MT or minus ends cannot be specifically visualised in live  
408 in this system; it is possible that  $\gamma$ -tubulin also contributes to MT nucleation under normal  
409 conditions. Finally, in the electron tomography of the metaphase spindle, MT ends  
410 associated with  $\gamma$ -TuRC (ends are closed) and without  $\gamma$ -TuRC (ends are open) were  
411 detected (Kamasaki et al., 2013; O'Toole et al., 2003). The open ends represent either plus  
412 ends of MTs or the minus ends of MTs nucleated independent of  $\gamma$ -tubulin. Taken together,  
413 it can be assumed that the  $\gamma$ -tubulin-independent mechanism operates and plays a role in  
414 the activity of at least certain animal and plant cell types.

415

## 416 **Materials and methods**

417

### 418 **Plasmid, cell culture, and cell line selection**

419 Plasmids for CRISPR/Cas9-mediated genome editing and auxin-inducible degron were  
420 constructed using standard protocols (Natsume et al., 2016; Okumura et al., 2018). The  
421 plasmids and sgRNA sequences used in this study are listed in Tables S1 and S2,  
422 respectively. In the normal passage, the HCT116 cell line possessing DOX-inducible tet-  
423 OsTIR1 was cultured at 37°C with McCoy's 5A medium (Gibco) supplemented with 10%  
424 serum and 1% antibiotics (Natsume et al., 2016). Knock-in and knockout lines were  
425 generated by CRISPR/Cas9 genome editing essentially as previously described  
426 (Okumura et al., 2018). CRISPR/Cas9 and donor plasmids were co-transfected into the  
427 cell lines using Effectene (Qiagen, Venlo, Netherlands). For drug selection, 1 µg/mL  
428 puromycin (Wako Pure Chemical Industries, Osaka, Japan), 800 µg/mL G418 (Roche,  
429 Basel, Switzerland), 200 µg/mL hygromycin B (Wako Pure Chemical Industries), and 8  
430 µg/mL blasticidin S hydrochloride (Funakoshi Biotech, Tokyo, Japan) were used.  
431 Selection medium was replaced with fresh selection medium 4–5 d after starting selection.  
432 After 10–14 d, colonies grown on a 10 cm culture dish were washed once with PBS,  
433 picked up with a pipette tip under a microscope (EVOS XL, Thermo Fisher Scientific,  
434 Waltham, MA) located on a clean bench, and subsequently transferred to a 96-well plate  
435 containing 50 µL of trypsin-EDTA. After a few minutes, the trypsinized cells were  
436 transferred to a 24-well plate containing 500 µL of the selection medium, and then further  
437 transferred to a 96-well plate (200 µL per well) for the preparation of genomic DNA. For  
438 the preparation of genomic DNA, cells in the 96-well plate were washed once with PBS  
439 and lysed by 90 µL of 50 mM NaOH. After boiling for 10 min, the solution was  
440 equilibrated by 10 µL of 100 mM Tris-HCl (pH 9.0). To confirm the genomic insertion,  
441 PCR was performed using 1–2 µL of the genomic DNA solution and Tks Gflex DNA  
442 polymerase (Takara Bio). The primers are listed in Table S3. For the TubG1-KO/TubG2-  
443 mClover-mAID line,  $\gamma$ -tubulin and  $\alpha$ -tubulin were immunoblotted with monoclonal  
444 antibodies GTU88 (Sigma, 1:10,000) and DM1A (Sigma, 1:2,000), respectively, and the  
445 lack of untagged  $\gamma$ -tubulin protein was confirmed. Proper tagging to ch-TOG, CLASP1  
446 and TPX2, and biallelic deletion of CAMSAP3 and AKAP450 were confirmed by  
447 immunoblotting with specific antibodies as follows: ch-TOG (QED Bioscience, 1:1,000),  
448 CLASP1 (Abcam, 1:1,000), TPX2 (anti-rabbit, 1:200, a gift of Dr. Isabelle Vernos (Gruss  
449 et al., 2002)), CAMSAP3 (anti-rabbit, 1:200, gift of Dr. Masatoshi Takeichi (Tanaka et  
450 al., 2012)) and AKAP450 (anti-rabbit, 1:1,000, gift of Dr. Yoshitaka Ono (Takahashi et  
451 al., 1999)). All tagged lines grew in a manner that was indistinguishable from the parental  
452 line, indicating that the tag did not substantially affect protein function. To activate auxin-  
453 inducible degradation, cells were treated with 2 µg/mL Dox for 20–24 h and 500 µM IAA  
454 for the duration indicated in each figure. RNAi was performed using Lipofectamine  
455 RNAiMAX (Invitrogen), following manufacturer's instruction.

456

#### 457 **Biochemistry**

458 Immunoblotting was performed using a standard protocol with SDS sample buffer, except  
459 for ch-TOG detection, which might be prone to degradation during this procedure. For  
460 ch-TOG, cells were treated with 4M urea-containing sample buffer for 10 min at room  
461 temperature (Ito and Goshima, 2015). Sucrose gradient centrifugation was performed  
462 according to previously reported methods (Choi et al., 2010; Teixeira-Travesa et al., 2010).  
463 Confluent cells on three 10-cm culture dishes were lysed with 800 µL lysis buffer (50  
464 mM HEPES-KOH pH 7.6, 150 mM NaCl, 1 mM EGTA, 1 mM MgCl<sub>2</sub>, 1 mM DTT,  
465 0.5% NP-40, 100 µM GTP, and protease inhibitors), followed by 27 G needle passages.

466 After two rounds of centrifugation (13,000 rpm, 15 min in a tabletop centrifuge and  
467 50,000 rpm, 15 min in TLA100.3 rotor [Beckmann]), 500  $\mu$ L supernatant was loaded  
468 onto a 10%–40% sucrose gradient in a SETON tube (#7022), which was prepared using  
469 Gradient Station (BIOCOMP), and centrifuged in an MLS-50 rotor (Beckmann) at 50,000  
470 rpm for 3 h 45 min at 4 °C. Fractionation was performed with Gradient Station attached  
471 to MicroCollector (AC-5700P, ATTO). Aldolase (7.4S) and thyroglobulin (19S) were  
472 used as size markers.

473

#### 474 **Microscopy**

475 Imaging was mostly performed using spinning-disc confocal microscopy with a 60 $\times$  1.40  
476 NA lens (Nikon). A CSU-X1 confocal unit (Yokogawa Electric Corporation) and an  
477 EMCCD camera ImagEM (Hamamatsu Photonics) were attached to a Ti-E inverted  
478 microscope (Nikon) with a perfect focus system. Several DIC images were acquired with  
479 another spinning-disc confocal microscope, in which CSU-W1 and ORCA-Flash4.0  
480 digital CMOS camera (Hamamatsu Photonics) were attached to Ti-E (courtesy of Dr.  
481 Tomomi Kiyomitsu). Oblique illumination fluorescence microscopy was performed  
482 following the method used for plant cell imaging (Nakaoka et al., 2015). Briefly, the  
483 cortical region of interphase cells on the glass-bottom dish was imaged every 2 s with a  
484 Nikon Ti-E microscope equipped with an EMCCD camera Evolve (Roper) and the total  
485 internal reflection fluorescence unit and a 100  $\times$  1.49 NA lens (Nikon). A fragment of  
486 broken glass was placed on the sample to flatten the cells. Imaging for regrowth assay  
487 was performed mostly at 25–26 °C and sometimes at 37°C as indicated in the figure.  
488 Time-lapse imaging of regular mitosis and the degron efficiency analysis were performed  
489 at 37°C. The microscopes were controlled using NIS-Elements software (Nikon).  
490 Centrin-2 immunostaining was performed with a specific antibody (SantaCruz, rabbit,  
491 1:500) after methanol fixation. All image analyses of live spinning-discs were based on  
492 maximum projection images, whereas a single focal plane was shown for the  
493 immunofluorescence image and measurement of SiR-tubulin signals. To optimise the  
494 image brightness, the same linear adjustments were applied using Fiji. MT growth in  
495 prometaphase was determined at 30 min; the appearance of filamentous signals  
496 emanating from MTOCs were the indicator of MT regrowth.

497

#### 498 **MT regrowth assay**

499 The flowcharts are shown in the figures. In one mitosis experiment, typically 3–4  
500 analysable cells were obtained; to obtain  $N \geq 10$ , at least three independent experiments  
501 were performed. Cells were cultured in 4-well glass-bottomed dishes (CELLview™,  
502 #627870; Greiner Bio-One, Kremsmünster, Austria) and maintained in a stage-top  
503 incubator (Tokai Hit, Fujinomiya, Japan). 5% CO<sub>2</sub> was supplied. The heater was not  
504 turned on, and the experiment was performed at room temperature (~25°C). MTs were  
505 stained with 50 nM SiR-tubulin (Spirochrome) for >1 h prior to image acquisition  
506 (Lukinavicius et al., 2014; Okumura et al., 2018). Cells in a 4-well glass-bottom dish were  
507 treated with 40 ng/mL nocodazole on ice for 4 h (interphase) or at 37°C for 20–24 h  
508 (prometaphase), followed by drug washout by medium exchange twice (1 min each, 700–  
509 800  $\mu$ L, room temperature). This incubation time on ice was set as residual MTs or dead  
510 cells were detected by shorter or longer incubation, respectively. The specimen was  
511 immediately set under a microscope, and images were acquired. In most experiments, the

512 cells were kept at room temperature (~25°C) to prevent MT nucleation before sample  
513 setup and slow down the nucleation step. For regrowth assay at 37°C, cells were washed  
514 by 37°C warmed medium and the temperature was controlled by stage top incubator.  
515 Images were acquired every 30 s for 30 min with spinning-disc microscopy equipped with  
516 a piezo stage (1 μm × 3 or 5 z-sections). The maximum projection images are displayed  
517 in the figures. Cells were treated with mitotic kinase inhibitors for 2 h prior to imaging,  
518 and imaging was performed in the presence of drug treatments (BI2336, 10 μM;  
519 ZM447439, 10 μM; and Alisertib, 0.5 μM). BI2536 was effective at this concentration in  
520 the HCT116-TubG1 degron line, as 16 out of 17 cells showed monopolar spindles at only  
521 30 nM. ZM447439 was shown to be effective in HCT116 cells at concentrations of 2 μM  
522 or higher (Dreier et al., 2009; Li et al., 2010). Moreover, we reproduced the phenotype  
523 using RNAi. The reported IC50 value of alisertib in HCT116 was 0.032 μM (Manfredi et  
524 al., 2011) and 0.04 μM (Davis et al., 2015), which is much lower than our applied  
525 concentration (0.5 μM). Other studies have shown that p53 is fully activated at 0.4 μM or  
526 above (Marxer et al., 2014) or that apoptosis is observed similarly at 0.1 μM and 1 μM  
527 (Pitts et al., 2016).

528

## 529 **Acknowledgments**

530 We would like to thank Tomomi Kiyomitsu for cell lines, reagents, and valuable  
531 comments on the manuscript, Marie Nishikawa for the selection of a cell line, Tomoko  
532 Nishiyama for help of sucrose gradient centrifugation, and Aoi Takeda for checking  
533 several cell lines. This work was funded by JSPS KAKENHI (17H01431), and JSPS and  
534 DFG under the Joint Research Projects-LEAD with UKRI to G.G. The authors declare  
535 no conflicts of interest.

536

## 537 **References**

538

- 539 Al-Bassam, J., H. Kim, G. Brouhard, A. van Oijen, S.C. Harrison, and F. Chang. 2010. CLASP  
540 promotes microtubule rescue by recruiting tubulin dimers to the microtubule. *Dev Cell*.  
541 19:245-258.
- 542 Alfaro-Aco, R., A. Thawani, and S. Petry. 2020. Biochemical reconstitution of branching  
543 microtubule nucleation. *Elife*. 9.
- 544 Ayukawa, R., S. Iwata, H. Imai, S. Kamimura, M. Hayashi, K.X. Ngo, I. Minoura, S. Uchimura,  
545 T. Makino, M. Shirouzu, H. Shigematsu, K. Sekimoto, B. Gigant, and E. Muto. 2021.  
546 GTP-dependent formation of straight tubulin oligomers leads to microtubule nucleation.  
547 *J Cell Biol*. 220.
- 548 Brattain, M.G., W.D. Fine, F.M. Khaled, J. Thompson, and D.E. Brattain. 1981. Heterogeneity  
549 of malignant cells from a human colonic carcinoma. *Cancer Res*. 41:1751-1756.
- 550 Brouhard, G.J., J.H. Stear, T.L. Noetzel, J. Al-Bassam, K. Kinoshita, S.C. Harrison, J. Howard,  
551 and A.A. Hyman. 2008. XMAP215 is a processive microtubule polymerase. *Cell*.  
552 132:79-88.
- 553 Brunet, S., T. Sardon, T. Zimmerman, T. Wittmann, R. Pepperkok, E. Karsenti, and I. Vernos.  
554 2004. Characterization of the TPX2 domains involved in microtubule nucleation and  
555 spindle assembly in *Xenopus* egg extracts. *Mol Biol Cell*. 15:5318-5328.
- 556 Carmona, M., M. Wheelock, H. Funabiki, and W.C. Earnshaw. 2012. The chromosomal  
557 passenger complex (CPC): from easy rider to the godfather of mitosis. *Nat Rev Mol Cell*  
558 *Biol*. 13:789-803.

- 559 Cavazza, T., P. Malgaretti, and I. Vernos. 2016. The sequential activation of the mitotic  
560 microtubule assembly pathways favors bipolar spindle formation. *Mol Biol Cell*.  
561 27:2935-2945.
- 562 Chinen, T., P. Liu, S. Shioda, J. Pagel, B. Cerikan, T.C. Lin, O. Gruss, Y. Hayashi, H. Takeno,  
563 T. Shima, Y. Okada, I. Hayakawa, Y. Hayashi, H. Kigoshi, T. Usui, and E. Schiebel.  
564 2015. The gamma-tubulin-specific inhibitor gatastatin reveals temporal requirements of  
565 microtubule nucleation during the cell cycle. *Nat Commun*. 6:8722.
- 566 Choi, Y.K., P. Liu, S.K. Sze, C. Dai, and R.Z. Qi. 2010. CDK5RAP2 stimulates microtubule  
567 nucleation by the gamma-tubulin ring complex. *J Cell Biol*. 191:1089-1095.
- 568 Consolati, T., J. Locke, J. Roostalu, Z.A. Chen, J. Gannon, J. Asthana, W.M. Lim, F. Martino,  
569 M.A. Cvetkovic, J. Rappsilber, A. Costa, and T. Surrey. 2020. Microtubule Nucleation  
570 Properties of Single Human gammaTuRCs Explained by Their Cryo-EM Structure. *Dev*  
571 *Cell*. 53:603-617 e608.
- 572 David, A.F., P. Roudot, W.R. Legant, E. Betzig, G. Danuser, and D.W. Gerlich. 2019. Augmin  
573 accumulation on long-lived microtubules drives amplification and kinetochore-directed  
574 growth. *J Cell Biol*. 218:2150-2168.
- 575 Davis, S.L., K.M. Robertson, T.M. Pitts, J.J. Tentler, E.L. Bradshaw-Pierce, P.J. Klauck, S.M.  
576 Bagby, S.L. Hyatt, H.M. Selby, A. Spreafico, J.A. Ecsedy, J.J. Arcaroli, W.A.  
577 Messersmith, A.C. Tan, and S.G. Eckhardt. 2015. Combined inhibition of MEK and  
578 Aurora A kinase in KRAS/PIK3CA double-mutant colorectal cancer models. *Front*  
579 *Pharmacol*. 6:120.
- 580 Dreier, M.R., A.Z. Grabovich, J.D. Katusin, and W.R. Taylor. 2009. Short and long-term tumor  
581 cell responses to Aurora kinase inhibitors. *Exp Cell Res*. 315:1085-1099.
- 582 Efimov, A., A. Kharitonov, N. Efimova, J. Loncarek, P.M. Miller, N. Andreyeva, P. Gleeson,  
583 N. Galjart, A.R. Maia, I.X. McLeod, J.R. Yates, 3rd, H. Maiato, A. Khodjakov, A.  
584 Akhmanova, and I. Kaverina. 2007. Asymmetric CLASP-dependent nucleation of  
585 noncentrosomal microtubules at the trans-Golgi network. *Dev Cell*. 12:917-930.
- 586 Flor-Parra, I., A.B. Iglesias-Romero, and F. Chang. 2018. The XMAP215 Ortholog Alp14  
587 Promotes Microtubule Nucleation in Fission Yeast. *Curr Biol*. 28:1681-1691 e1684.
- 588 Gavilan, M.P., P. Gandolfo, F.R. Balestra, F. Arias, M. Bornens, and R.M. Rios. 2018. The dual  
589 role of the centrosome in organizing the microtubule network in interphase. *EMBO Rep*.  
590 19.
- 591 Goodwin, S.S., and R.D. Vale. 2010. Patronin regulates the microtubule network by protecting  
592 microtubule minus ends. *Cell*. 143:263-274.
- 593 Gruss, O.J., M. Wittmann, H. Yokoyama, R. Pepperkok, T. Kufer, H. Sillje, E. Karsenti, I.W.  
594 Mattaj, and I. Vernos. 2002. Chromosome-induced microtubule assembly mediated by  
595 TPX2 is required for spindle formation in HeLa cells. *Nat Cell Biol*. 4:871-879.
- 596 Hannak, E., K. Oegema, M. Kirkham, P. Gonczy, B. Habermann, and A.A. Hyman. 2002. The  
597 kinetically dominant assembly pathway for centrosomal asters in *Caenorhabditis*  
598 *elegans* is gamma-tubulin dependent. *J Cell Biol*. 157:591-602.
- 599 Imasaki, T., S. Kikkawa, S. Niwa, Y. Saijo-Hamano, H. Shigematsu, K. Aoyama, K. Mitsuoka,  
600 M. Aoki, A. Sakamoto, Y. Tomabechei, N. Sakai, M. Shirouzu, S. Taguchi, Y.  
601 Yamagishi, T. Setsu, Y. Sakihama, T. Shimizu, E. Nitta, M. Takeichi, and R. Nitta.  
602 2021. CAMSAP2 organizes a  $\gamma$ -tubulin-independent microtubule nucleation centre.  
603 *bioRxiv*.
- 604 Ito, A., and G. Goshima. 2015. Microcephaly protein Asp focuses the minus ends of spindle  
605 microtubules at the pole and within the spindle. *J Cell Biol*. 211:999-1009.
- 606 Jiang, K., S. Hua, R. Mohan, I. Grigoriev, K.W. Yau, Q. Liu, E.A. Katrukha, A.F. Altelaar, A.J.  
607 Heck, C.C. Hoogenraad, and A. Akhmanova. 2014. Microtubule minus-end  
608 stabilization by polymerization-driven CAMSAP deposition. *Dev Cell*. 28:295-309.

- 609 Kamasaki, T., E. O'Toole, S. Kita, M. Osumi, J. Usukura, J.R. McIntosh, and G. Goshima.  
610 2013. Augmin-dependent microtubule nucleation at microtubule walls in the spindle. *J*  
611 *Cell Biol.* 202:25-33.
- 612 Katayama, H., K. Sasai, M. Kloc, B.R. Brinkley, and S. Sen. 2008. Aurora kinase-A regulates  
613 kinetochore/chromatin associated microtubule assembly in human cells. *Cell Cycle.*  
614 7:2691-2704.
- 615 King, B.R., M. Moritz, H. Kim, D.A. Agard, C.L. Asbury, and T.N. Davis. 2020. XMAP215  
616 and gamma-tubulin additively promote microtubule nucleation in purified solutions.  
617 *Mol Biol Cell.* 31:2187-2194.
- 618 King, M.R., and S. Petry. 2020. Phase separation of TPX2 enhances and spatially coordinates  
619 microtubule nucleation. *Nat Commun.* 11:270.
- 620 Leong, S.Y., M. Yamada, N. Yanagisawa, and G. Goshima. 2018. SPIRAL2 Stabilises  
621 Endoplasmic Microtubule Minus Ends in the Moss *Physcomitrella patens*. *Cell Struct*  
622 *Funct.* 43:53-60.
- 623 Li, M., A. Jung, U. Ganswindt, P. Marini, A. Friedl, P.T. Daniel, K. Lauber, V. Jendrossek, and  
624 C. Belka. 2010. Aurora kinase inhibitor ZM447439 induces apoptosis via mitochondrial  
625 pathways. *Biochem Pharmacol.* 79:122-129.
- 626 Liu, L., E. Tuzel, and J.L. Ross. 2011. Loop formation of microtubules during gliding at high  
627 density. *J Phys Condens Matter.* 23:374104.
- 628 Liu, P., M. Wurtz, E. Zupa, S. Pfeffer, and E. Schiebel. 2021. Microtubule nucleation: The  
629 waltz between gamma-tubulin ring complex and associated proteins. *Curr Opin Cell*  
630 *Biol.* 68:124-131.
- 631 Liu, P., E. Zupa, A. Neuner, A. Bohler, J. Loerke, D. Flemming, T. Ruppert, T. Rudack, C.  
632 Peter, C. Spahn, O.J. Gruss, S. Pfeffer, and E. Schiebel. 2020. Insights into the  
633 assembly and activation of the microtubule nucleator gamma-TuRC. *Nature.* 578:467-  
634 471.
- 635 Logarinho, E., S. Maffini, M. Barisic, A. Marques, A. Toso, P. Meraldi, and H. Maiato. 2012.  
636 CLASPs prevent irreversible multipolarity by ensuring spindle-pole resistance to  
637 traction forces during chromosome alignment. *Nat Cell Biol.* 14:295-303.
- 638 Luders, J., U.K. Patel, and T. Stearns. 2006. GCP-WD is a gamma-tubulin targeting factor  
639 required for centrosomal and chromatin-mediated microtubule nucleation. *Nat Cell*  
640 *Biol.* 8:137-147.
- 641 Lukinavicius, G., L. Reymond, E. D'Este, A. Masharina, F. Gottfert, H. Ta, A. Guther, M.  
642 Fournier, S. Rizzo, H. Waldmann, C. Blaukopf, C. Sommer, D.W. Gerlich, H.D. Arndt,  
643 S.W. Hell, and K. Johnsson. 2014. Fluorogenic probes for live-cell imaging of the  
644 cytoskeleton. *Nat Methods.* 11:731-733.
- 645 Maffini, S., A.R. Maia, A.L. Manning, Z. Maliga, A.L. Pereira, M. Junqueira, A. Shevchenko,  
646 A. Hyman, J.R. Yates, 3rd, N. Galjart, D.A. Compton, and H. Maiato. 2009. Motor-  
647 independent targeting of CLASPs to kinetochores by CENP-E promotes microtubule  
648 turnover and poleward flux. *Curr Biol.* 19:1566-1572.
- 649 Magnaghi-Jaulin, L., G. Eot-Houllier, E. Gallaud, and R. Giet. 2019. Aurora A Protein Kinase:  
650 To the Centrosome and Beyond. *Biomolecules.* 9.
- 651 Manfredi, M.G., J.A. Ecsedy, A. Chakravarty, L. Silverman, M. Zhang, K.M. Hoar, S.G.  
652 Stroud, W. Chen, V. Shinde, J.J. Huck, D.R. Wysong, D.A. Janowick, M.L. Hyer, P.J.  
653 Leroy, R.E. Gershman, M.D. Silva, M.S. Germanos, J.B. Bolen, C.F. Claiborne, and  
654 T.B. Sells. 2011. Characterization of Alisertib (MLN8237), an investigational small-  
655 molecule inhibitor of aurora A kinase using novel in vivo pharmacodynamic assays.  
656 *Clin Cancer Res.* 17:7614-7624.
- 657 Marxer, M., H.T. Ma, W.Y. Man, and R.Y. Poon. 2014. p53 deficiency enhances mitotic arrest  
658 and slippage induced by pharmacological inhibition of Aurora kinases. *Oncogene.*  
659 33:3550-3560.

- 660 McKinley, K.L., and I.M. Cheeseman. 2017. Large-Scale Analysis of CRISPR/Cas9 Cell-Cycle  
661 Knockouts Reveals the Diversity of p53-Dependent Responses to Cell-Cycle Defects.  
662 *Dev Cell.* 40:405-420 e402.
- 663 Moriwaki, T., and G. Goshima. 2016. Five factors can reconstitute all three phases of  
664 microtubule polymerization dynamics. *J Cell Biol.* 215:357-368.
- 665 Motegi, F., N.V. Velarde, F. Piano, and A. Sugimoto. 2006. Two phases of astral microtubule  
666 activity during cytokinesis in *C. elegans* embryos. *Dev Cell.* 10:509-520.
- 667 Nakaoka, Y., A. Kimura, T. Tani, and G. Goshima. 2015. Cytoplasmic nucleation and atypical  
668 branching nucleation generate endoplasmic microtubules in *Physcomitrella patens*.  
669 *Plant Cell.* 27:228-242.
- 670 Natsume, T., T. Kiyomitsu, Y. Saga, and M.T. Kanemaki. 2016. Rapid Protein Depletion in  
671 Human Cells by Auxin-Inducible Degron Tagging with Short Homology Donors. *Cell*  
672 *Rep.* 15:210-218.
- 673 O'Toole, E.T., K.L. McDonald, J. Mantler, J.R. McIntosh, A.A. Hyman, and T. Muller-Reichert.  
674 2003. Morphologically distinct microtubule ends in the mitotic centrosome of  
675 *Caenorhabditis elegans*. *J Cell Biol.* 163:451-456.
- 676 Oakley, C.E., and B.R. Oakley. 1989. Identification of gamma-tubulin, a new member of the  
677 tubulin superfamily encoded by mipA gene of *Aspergillus nidulans*. *Nature.* 338:662-  
678 664.
- 679 Okumura, M., T. Natsume, M.T. Kanemaki, and T. Kiyomitsu. 2018. Dynein-Dynactin-NuMA  
680 clusters generate cortical spindle-pulling forces as a multi-arm ensemble. *Elife.* 7.
- 681 Pitts, T.M., E.L. Bradshaw-Pierce, S.M. Bagby, S.L. Hyatt, H.M. Selby, A. Spreafico, J.J.  
682 Tentler, K. McPhillips, P.J. Klauck, A. Capasso, J.R. Diamond, S.L. Davis, A.C. Tan,  
683 J.J. Arcaroli, A. Purkey, W.A. Messersmith, J.A. Ecsedy, and S.G. Eckhardt. 2016.  
684 Antitumor activity of the aurora a selective kinase inhibitor, alisertib, against preclinical  
685 models of colorectal cancer. *Oncotarget.* 7:50290-50301.
- 686 Rivero, S., J. Cardenas, M. Bornens, and R.M. Rios. 2009. Microtubule nucleation at the cis-  
687 side of the Golgi apparatus requires AKAP450 and GM130. *EMBO J.* 28:1016-1028.
- 688 Rogers, G.C., N.M. Rusan, M. Peifer, and S.L. Rogers. 2008. A multicomponent assembly  
689 pathway contributes to the formation of acentrosomal microtubule arrays in interphase  
690 *Drosophila* cells. *Mol Biol Cell.* 19:3163-3178.
- 691 Roostalu, J., N.I. Cade, and T. Surrey. 2015. Complementary activities of TPX2 and chTOG  
692 constitute an efficient importin-regulated microtubule nucleation module. *Nat Cell Biol.*  
693 17:1422-1434.
- 694 Roostalu, J., and T. Surrey. 2017. Microtubule nucleation: beyond the template. *Nat Rev Mol*  
695 *Cell Biol.* 18:702-710.
- 696 Sallee, M.D., J.C. Zonka, T.D. Skokan, B.C. Raftrey, and J.L. Feldman. 2018. Tissue-specific  
697 degradation of essential centrosome components reveals distinct microtubule  
698 populations at microtubule organizing centers. *PLoS Biol.* 16:e2005189.
- 699 Slep, K.C., and R.D. Vale. 2007. Structural basis of microtubule plus end tracking by  
700 XMAP215, CLIP-170, and EB1. *Mol Cell.* 27:976-991.
- 701 Takahashi, M., H. Shibata, M. Shimakawa, M. Miyamoto, H. Mukai, and Y. Ono. 1999.  
702 Characterization of a novel giant scaffolding protein, CG-NAP, that anchors multiple  
703 signaling enzymes to centrosome and the golgi apparatus. *J Biol Chem.* 274:17267-  
704 17274.
- 705 Tanaka, N., W. Meng, S. Nagae, and M. Takeichi. 2012. Nezh/CAMSAP3 and CAMSAP2  
706 cooperate in epithelial-specific organization of noncentrosomal microtubules. *Proc Natl*  
707 *Acad Sci U S A.* 109:20029-20034.
- 708 Tariq, A., L. Green, J.C.G. Jaynes, C. Soeller, and J.G. Wakefield. 2020. In vitro reconstitution  
709 of branching microtubule nucleation. *Elife.* 9.

- 710 Teixido-Travesa, N., J. Villen, C. Lacasa, M.T. Bertran, M. Archinti, S.P. Gygi, C. Caelles, J.  
711 Roig, and J. Luders. 2010. The gammaTuRC revisited: a comparative analysis of  
712 interphase and mitotic human gammaTuRC redefines the set of core components and  
713 identifies the novel subunit GCP8. *Mol Biol Cell*. 21:3963-3972.
- 714 Thawani, A., R.S. Kadzik, and S. Petry. 2018. XMAP215 is a microtubule nucleation factor that  
715 functions synergistically with the gamma-tubulin ring complex. *Nat Cell Biol*. 20:575-  
716 585.
- 717 Tovey, C.A., and P.T. Conduit. 2018. Microtubule nucleation by gamma-tubulin complexes and  
718 beyond. *Essays Biochem*. 62:765-780.
- 719 Tsuchiya, K., H. Hayashi, M. Nishina, M. Okumura, Y. Sato, M.T. Kanemaki, G. Goshima, and  
720 T. Kiyomitsu. 2021. Ran-GTP Is Non-essential to Activate NuMA for Mitotic Spindle-  
721 Pole Focusing but Dynamically Polarizes HURP Near Chromosomes. *Curr Biol*.  
722 31:115-127 e113.
- 723 Tulu, U.S., C. Fagerstrom, N.P. Ferenz, and P. Wadsworth. 2006. Molecular requirements for  
724 kinetochore-associated microtubule formation in mammalian cells. *Curr Biol*. 16:536-  
725 541.
- 726 Tungadi, E.A., A. Ito, T. Kiyomitsu, and G. Goshima. 2017. Human microcephaly ASPM  
727 protein is a spindle pole-focusing factor that functions redundantly with CDK5RAP2. *J*  
728 *Cell Sci*. 130:3676-3684.
- 729 Wang, S., D. Wu, S. Quintin, R.A. Green, D.K. Cheerambathur, S.D. Ochoa, A. Desai, and K.  
730 Oegema. 2015. NOCA-1 functions with gamma-tubulin and in parallel to Patronin to  
731 assemble non-centrosomal microtubule arrays in *C. elegans*. *Elife*. 4:e08649.
- 732 Wieczorek, M., S. Bechstedt, S. Chaaban, and G.J. Brouhard. 2015. Microtubule-associated  
733 proteins control the kinetics of microtubule nucleation. *Nat Cell Biol*. 17:907-916.
- 734 Wieczorek, M., S.C. Ti, L. Urnavicius, K.R. Molloy, A. Aher, B.T. Chait, and T.M. Kapoor.  
735 2021. Biochemical reconstitutions reveal principles of human gamma-TuRC assembly  
736 and function. *J Cell Biol*. 220.
- 737 Wieczorek, M., L. Urnavicius, S.C. Ti, K.R. Molloy, B.T. Chait, and T.M. Kapoor. 2020.  
738 Asymmetric Molecular Architecture of the Human gamma-Tubulin Ring Complex.  
739 *Cell*. 180:165-175 e116.
- 740 Wong, Y.L., J.V. Anzola, R.L. Davis, M. Yoon, A. Motamedi, A. Kroll, C.P. Seo, J.E. Hsia,  
741 S.K. Kim, J.W. Mitchell, B.J. Mitchell, A. Desai, T.C. Gahman, A.K. Shiau, and K.  
742 Oegema. 2015. Cell biology. Reversible centriole depletion with an inhibitor of Polo-  
743 like kinase 4. *Science*. 348:1155-1160.
- 744 Woodruff, J.B., B. Ferreira Gomes, P.O. Widlund, J. Mahamid, A. Honigmann, and A.A.  
745 Hyman. 2017. The Centrosome Is a Selective Condensate that Nucleates Microtubules  
746 by Concentrating Tubulin. *Cell*. 169:1066-1077 e1010.
- 747 Wu, J., C. de Heus, Q. Liu, B.P. Bouchet, I. Noordstra, K. Jiang, S. Hua, M. Martin, C. Yang, I.  
748 Grigoriev, E.A. Katrukha, A.F.M. Altelaar, C.C. Hoogenraad, R.Z. Qi, J. Klumperman,  
749 and A. Akhmanova. 2016. Molecular Pathway of Microtubule Organization at the Golgi  
750 Apparatus. *Dev Cell*. 39:44-60.
- 751 Yu, N., L. Signorile, S. Basu, S. Ottema, J.H. Lebbink, K. Leslie, I. Smal, D. Dekkers, J.  
752 Demmers, and N. Galjart. 2016. Isolation of functional tubulin dimers and of tubulin-  
753 associated proteins from mammalian cells. *Curr Biol*. 26:1728-1736.
- 754 Zheng, Y., R.A. Buchwalter, C. Zheng, E.M. Wight, J.V. Chen, and T.L. Megraw. 2020. A  
755 perinuclear microtubule-organizing centre controls nuclear positioning and basement  
756 membrane secretion. *Nat Cell Biol*. 22:297-309.
- 757 Zheng, Y., M.L. Wong, B. Alberts, and T. Mitchison. 1995. Nucleation of microtubule  
758 assembly by a gamma-tubulin-containing ring complex. *Nature*. 378:578-583.
- 759  
760



761 **Movie 1. Mitotic localisation of tagged proteins**

762 mClover-tagged TubG1 and mCherry-tagged ch-TOG, CLASP1, and TPX2 were imaged  
763 with MTs (visualised with SiR-tubulin) using spinning-disc confocal microscopy. Time  
764 indicates hours and minutes. Bar, 10  $\mu$ m.

765

766 **Movie 2. Spindle phenotype after  $\gamma$ -tubulin depletion**

767 Mitotic progression after  $\gamma$ -tubulin depletion. MTs (green) were visualised using SiR-  
768 tubulin and imaging was performed using spinning-disc confocal microscopy. Magenta;  
769 TubG1-mClover. Time is shown in hours and minutes.

770

771 **Movie 3. MT regrowth after depolymerisation in interphase**

772 Indicated proteins were depleted by AID in cells marked in white circles. MTs were  
773 visualised by SiR-tubulin and imaged using spinning-disc confocal microscopy. Time  
774 indicates minutes and seconds.

775

776 **Movie 4. MT regrowth after depolymerisation in interphase-oblique illumination**

777 MT regrowth in a  $\gamma$ -tubulin-depleted cell was observed using oblique illumination  
778 fluorescence microscopy. The region near the cell cortex was visualised using microscopy.  
779 Ring-shaped MTs are indicated by arrows. Time indicates minutes and seconds.

780

781 **Movie 5. MT regrowth after depolymerisation in mitosis**

782 The indicated proteins were depleted by AID in the white-circled cells. MTs were  
783 visualised by SiR-tubulin and imaged using spinning-disc confocal microscopy. Multiple  
784 ncMTOCs were detected in the  $\gamma$ -tubulin single-depleted cells. Time indicates minutes  
785 and seconds.

786

787 **Table S1. Plasmids for homologous recombination**

| Name  | Purpose                         | Homology arm |        | Selection   |
|-------|---------------------------------|--------------|--------|-------------|
|       |                                 | N term       | C term |             |
| pKT1  | TubG1-mClover-mAID integration  | 248 bp       | 202 bp | G418        |
| pKT11 | TubG2 knock out                 | 642 bp       | 526 bp | blasticidin |
| pKT35 | ch-TOG-mAID-mCherry integration | 600 bp       | 669 bp | hygromycin  |
| pKT52 | ch-TOG-mCherry integration      | 600 bp       | 669 bp | hygromycin  |
| pKT90 | CLASP1-mAID-mCherry integration | 574 bp       | 632 bp | hygromycin  |
| pKT43 | TPX2-mAID-mCherry integration   | 201 bp       | 254 bp | hygromycin  |
| pKT53 | TPX2-mCherry integration        | 201 bp       | 254 bp | hygromycin  |
| pKT55 | AKAP450 knock out               | 598 bp       | 601 bp | hygromycin  |
| pKT58 | CAMSAP3 knock out               | 834 bp       | 585 bp | hygromycin  |

788

789

790

**Table S2. sgRNA sequences for CRISPR/Cas9-mediated genome editing**

| Gene                    | sgRNA (5'-3')        | PAM | plasmid |
|-------------------------|----------------------|-----|---------|
| TubG1                   | AGTCTGGCCGTGTGGCCGCA | TGG | pTK611  |
| TubG2<br>(N-terminus)   | TGCAGGGTGATGATCTCCCG | GGG | pKT13   |
| TubG2<br>(C-terminus)   | CTAGAAGGAGAAGGAGTAGT | GGG | pKT14   |
| ch-TOG                  | CTGCAGGGTGCCGGGGGAGT | GGG | pKT36   |
| CLASP1                  | CCTGGGCTGATACGCACACC | TGG | pKT76   |
| TPX2                    | GAAATCCGAGGGGGCATCAT | AGG | pTK526  |
| AKAP450<br>(N-terminus) | GCTGGAGGCCGGCAAAGCCA | AGG | pKT7    |
| AKAP450<br>(C-terminus) | GAGCTGTGGGTCTCGCACTG | TGG | pKT8    |
| CAMSAP3<br>(N-terminus) | TGGACCAGTACGATTTCTCG | CGG | pKT56   |
| CAMSAP3<br>(C-terminus) | GGTGAAGGCATCGACGCTCA | TGG | pKT57   |

791

792

793

**Table S3. PCR primers to confirm gene editing**

| Gene                   | Primer sequences (5'-3') |        |
|------------------------|--------------------------|--------|
| TubG1<br>(C-terminus)  | CCAAGCTCTTCGAGAGAAC      | oTK848 |
|                        | GTGTTTGCAGGCCAACAG       | oTK849 |
| TubG1<br>(exon2,3)     | GTCCTTTCCTCAGACACGGG     | oKT107 |
|                        | ACGTCATAGAGCCTGTCCCT     | oKT108 |
| TubG2<br>(5' upstream) | GCCAAGGCAGGAGGATTGAT     | oKT33  |
|                        | TTTTCTCCCTCAGCAGTCGC     | oKT97  |
| TubG2<br>(exon1)       | ACACGGTGAGATCCCCATCT     | oKT38  |
|                        | CATGGAAGGGAAAGGGGGAC     | oKT34  |
| TubG2<br>(exon2-4)     | CAGTTGGGTTCGAGTTCTGGA    | oKT98  |
|                        | CCCCACTCCATAACTTCACC     | oKT99  |
| TubG2<br>(exon5,6)     | GTTGTGAGAGTGTGGCAGGA     | oKT147 |
|                        | TTCTGCGTCAGCCTCTTGAG     | oKT101 |
| TubG2                  | TTCTCTCCACCCTCCCTCTG     | oKT150 |

|                          |                      |        |
|--------------------------|----------------------|--------|
| (exon7-11)               | GAGCTCCTGAACAACCTCCC | oKT105 |
| TubG2<br>(3'UTR)         | TTCCATTGGCATCCCTCACC | oKT151 |
|                          | GGGAAGTCTGGACACCACAG | oKT152 |
| ch-TOG<br>(C-terminus)   | TCAGCCCTGGGATTACTGGA | oKT117 |
|                          | CTTGTGTGCCTTTGGTCAGC | oKT118 |
| CLASP1<br>(C-terminus)   | CTTGGCGAGGGAGTTTCACT | oKT304 |
|                          | CCCCTTGCCAATTCCTCCT  | oKT305 |
| TPX2<br>(N-terminus)     | CCACTGCTCCTGGCCTAAAA | oKT196 |
|                          | TGTGGCTGCCATCACTACAG | oKT172 |
| AKAP450<br>(N-terminus)  | GAGGGAGGGACTTTTCAGGC | oKT27  |
|                          | CACCCTGGAAAGCACAATGC | oKT286 |
| AKAP450<br>(Full length) | CAGGTAGGCTCAGGGAGGAT | oKT285 |
|                          | CCCCAAGGTGGAGTGTTAC  | oKT287 |
| CAMSAP3<br>(N-terminus)  | ACTCCTGCATTGACAGAGGC | oKT219 |
|                          | AATCGTACTGGTCCAGCGAC | oKT258 |
| CAMSAP3<br>(C-terminus)  | AGGTCCACGGCTGTACAAAG | oKT288 |
|                          | GACTTTGCAGGGAGGTGACA | oKT222 |

794

795

796

**Table S4. Primers for RNAi**

| siRNA       | Sequences (5'-3')          | Note                          |
|-------------|----------------------------|-------------------------------|
| Luciferase  | CGUACGCGGAAUACUUCGATT      | Goshima et al., 2008          |
| CDK5RAP2    | UGGAAGAUCUCCUAACUAATT      | Fong et al, 2008              |
| pericentrin | GCAGCUGAGCUGAAGGAGATT      | Dammermann and Merdes, 2002   |
| AKAP450     | AACUUUGAAGUUAACUAUCAA      | Wang et al., 2010             |
| NEDD1       | GCAGACAUGUGUCAUUUATT       | Lüders et al., 2006           |
| HAUS6       | CAGUUAAGCAGGUACGAAATT      | Goshima et al., 2008          |
| HSET        | UCAGAAGCAGCCUGUCAATT       | Cai et al., 2009              |
| NuSAP       | GGUGCAAGACUGUCCGUGUTT      | Sironi et al., 2011           |
| ch-TOG      | GAGCCCAGAGUGGUCCAAA        | Cassimeris and Morabito, 2004 |
| CLASP1      | GGAUGAUUUACAAGACUGGTT      | Kiyosue et al., 2005          |
| CLASP2      | GACAUACAUGGGUCUUAGATT      | Kiyosue et al., 2005          |
| CAMSAP1     | CAUCGAGAAGCUUAACGAATT      | Wei et al., 2017              |
| CAMSAP2     | UUGCAUGUGCUC AACAGUTT      | Yau et al., 2014              |
| CAMSAP3     | CAGCAGCCACCAACUCCGAGGUGAAT | Meng et al., 2008             |
| DHC         | GCCAAAAGUUACAGACUUUTT      | Splinter et al., 2008         |
| TPX2        | GGGCAAACUCCUUUGAGATT       | Bird and Hyman 2008           |
| Aurora B    | GUCCCAGAUAGAGAAGGAGTT      | Yüce et al., 2005             |

797

798

799 **References for Table S4**

- 800 Bird, A.W., and A.A. Hyman. 2008. Building a spindle of the correct length in human cells requires the  
801 interaction between TPX2 and Aurora A. *J Cell Biol.* 182:289-300.
- 802 Cai, S., L.N. Weaver, S.C. Ems-McClung, and C.E. Walczak. 2009. Kinesin-14 family proteins  
803 HSET/XCTK2 control spindle length by cross-linking and sliding microtubules. *Mol Biol Cell.*  
804 20:1348-1359.
- 805 Cassimeris, L., and J. Morabito. 2004. TOGp, the human homolog of XMAP215/Dis1, is required for  
806 centrosome integrity, spindle pole organization, and bipolar spindle assembly. *Mol Biol Cell.*  
807 15:1580-1590.
- 808 Dammermann, A., and A. Merdes. 2002. Assembly of centrosomal proteins and microtubule organization  
809 depends on PCM-1. *J Cell Biol.* 159:255-266.
- 810 Fong, K.W., Y.K. Choi, J.B. Rattner, and R.Z. Qi. 2008. CDK5RAP2 is a pericentriolar protein that  
811 functions in centrosomal attachment of the gamma-tubulin ring complex. *Mol Biol Cell.* 19:115-  
812 125.
- 813 Goshima, G., M. Mayer, N. Zhang, N. Stuurman, and R.D. Vale. 2008. Augmin: a protein complex  
814 required for centrosome-independent microtubule generation within the spindle. *J Cell Biol.*  
815 181:421-429.
- 816 Luders, J., U.K. Patel, and T. Stearns. 2006. GCP-WD is a gamma-tubulin targeting factor required for  
817 centrosomal and chromatin-mediated microtubule nucleation. *Nat Cell Biol.* 8:137-147.
- 818 Meng, W., Y. Mushika, T. Ichii, and M. Takeichi. 2008. Anchorage of microtubule minus ends to  
819 adherens junctions regulates epithelial cell-cell contacts. *Cell.* 135:948-959.
- 820 Mimori-Kiyosue, Y., I. Grigoriev, G. Lansbergen, H. Sasaki, C. Matsui, F. Severin, N. Galjart, F.  
821 Grosveld, I. Vorobjev, S. Tsukita, and A. Akhmanova. 2005. CLASP1 and CLASP2 bind to EB1  
822 and regulate microtubule plus-end dynamics at the cell cortex. *J Cell Biol.* 168:141-153.
- 823 Sironi, L., J. Solon, C. Conrad, T.U. Mayer, D. Brunner, and J. Ellenberg. 2011. Automatic quantification  
824 of microtubule dynamics enables RNAi-screening of new mitotic spindle regulators.  
825 *Cytoskeleton (Hoboken).* 68:266-278.
- 826 Splinter, D., M.E. Tanenbaum, A. Lindqvist, D. Jaarsma, A. Flotho, K.L. Yu, I. Grigoriev, D. Engelsma,  
827 E.D. Haasdijk, N. Keijzer, J. Demmers, M. Fornerod, F. Melchior, C.C. Hoogenraad, R.H.  
828 Medema, and A. Akhmanova. 2010. Bicaudal D2, dynein, and kinesin-1 associate with nuclear  
829 pore complexes and regulate centrosome and nuclear positioning during mitotic entry. *PLoS*  
830 *Biol.* 8:e1000350.
- 831 Wang, Z., T. Wu, L. Shi, L. Zhang, W. Zheng, J.Y. Qu, R. Niu, and R.Z. Qi. 2010. Conserved motif of  
832 CDK5RAP2 mediates its localization to centrosomes and the Golgi complex. *J Biol Chem.*  
833 285:22658-22665.
- 834 Wei, J., H. Xu, and W. Meng. 2017. Noncentrosomal microtubules regulate autophagosome transport  
835 through CAMSAP2-EB1 cross-talk. *FEBS Lett.* 591:2379-2393.
- 836 Yau, K.W., S.F. van Beuningen, I. Cunha-Ferreira, B.M. Cloin, E.Y. van Battum, L. Will, P. Schatzle,  
837 R.P. Tas, J. van Krugten, E.A. Katrukha, K. Jiang, P.S. Wulf, M. Mikhaylova, M. Harterink, R.J.  
838 Pasterkamp, A. Akhmanova, L.C. Kapitein, and C.C. Hoogenraad. 2014. Microtubule minus-end  
839 binding protein CAMSAP2 controls axon specification and dendrite development. *Neuron.*  
840 82:1058-1073.
- 841 Yuce, O., A. Piekny, and M. Glotzer. 2005. An ECT2-centralspindlin complex regulates the localization  
842 and function of RhoA. *J Cell Biol.* 170:571-582.

843

844

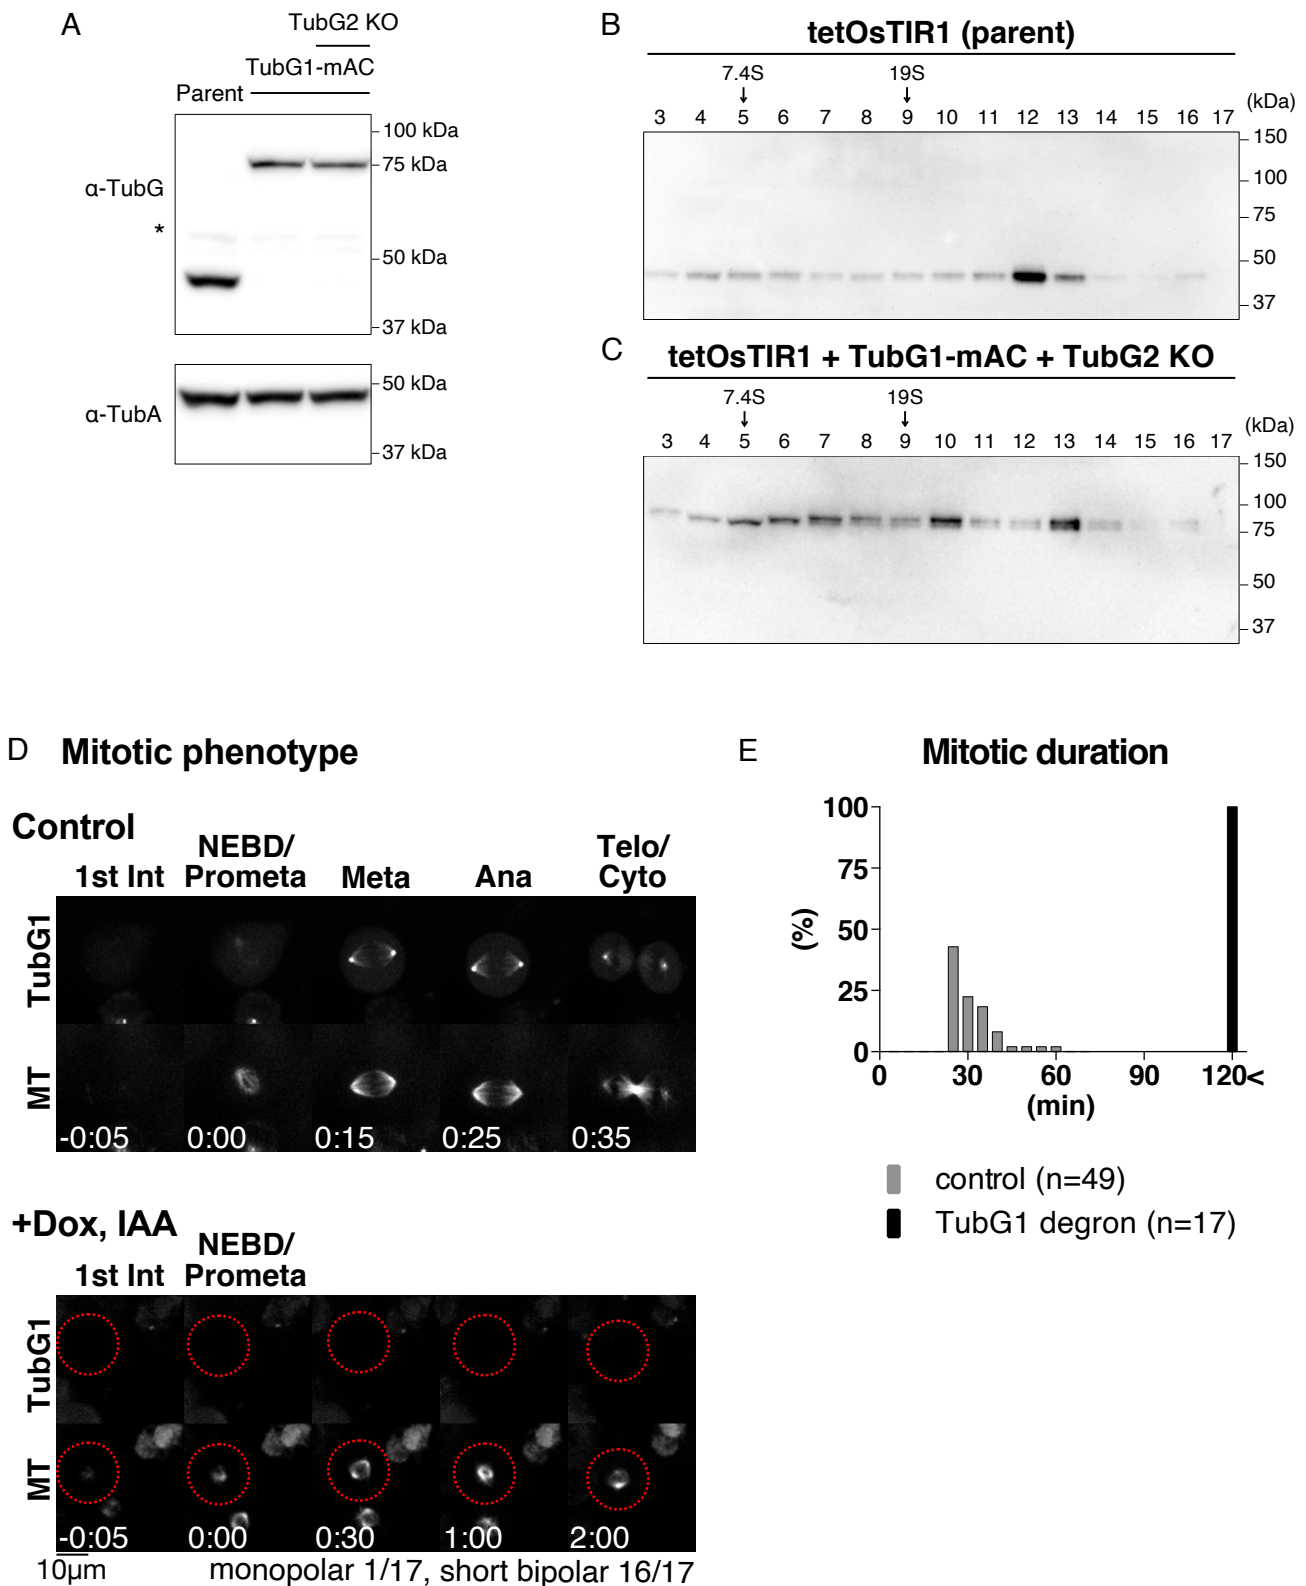

**Figure 1. Basic characterisation of TubG1 mAID-mClover cell line**

(A) Immunoblotting of  $\gamma$ -tubulin and  $\alpha$ -tubulin for TubG1-mAID-mClover lines (TubG2 intact and KO lines) and the parental line. (B, C) Sucrose gradient centrifugation followed by immunoblotting of  $\gamma$ -tubulin for parent line (B) and TubG1-mAID-mClover line (C). (D) Spindle dynamics in TubG1-depleted cells (TubG2 KO background) and control cells. Time 0 corresponds to NEBD. (E) Mitotic duration (NEBD to anaphase onset) of  $\gamma$ -tubulin-depleted cells.

**A TubG1-mAID-mClover & TubG2 KO +Dox/IAA 24hr**

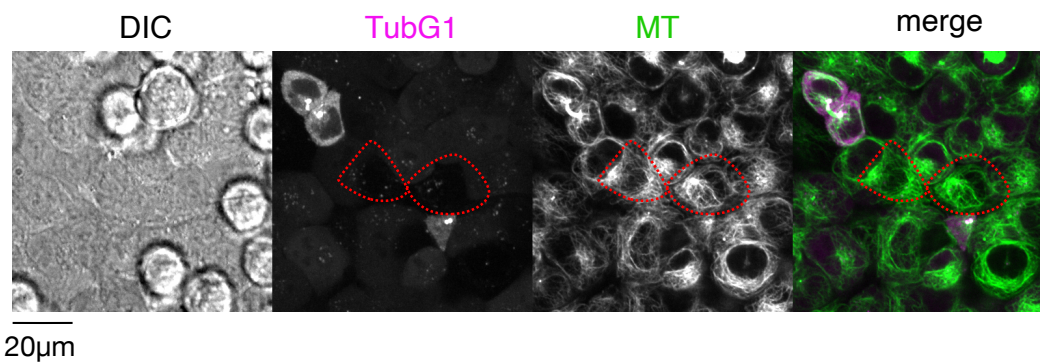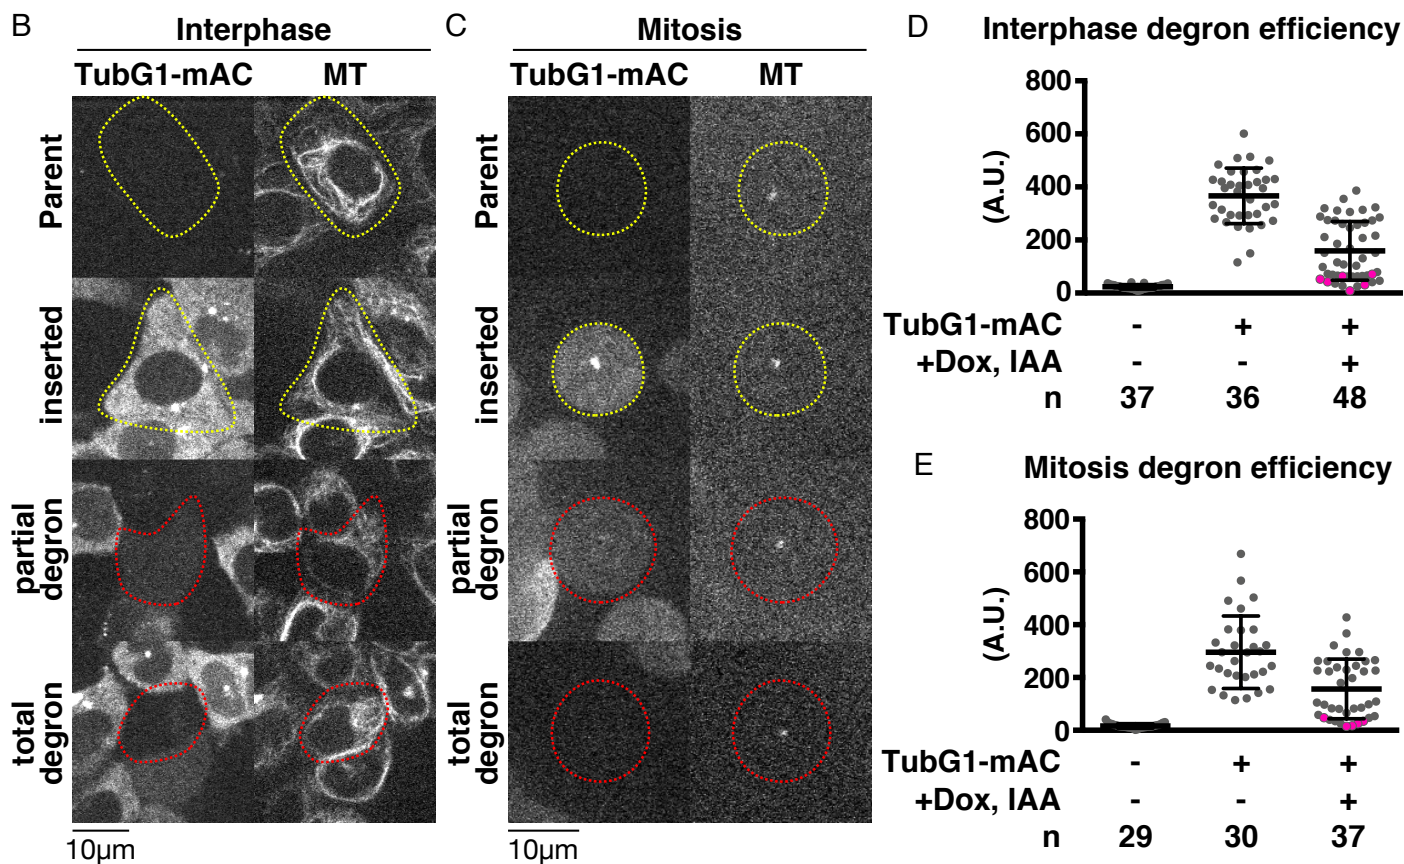

**Figure 2. Quantitative assessment of  $\gamma$ -tubulin depletion by AID**

(A) MTs are present in cells with undetectable levels of  $\gamma$ -tubulin. Dox/IAA treatment induced degradation of  $\gamma$ -tubulin-mClover in majority of the cells (two representative cells are marked in red circles). (B, C) TubG1-mClover signals in interphase (B) and mitosis (C). Cells circled in red or yellow circles were treated or untreated with Dox/ IAA, respectively. Cells in mitosis were treated with nocodazole to depolymerise most MTs (remaining punctate signals correspond to centrioles). (D, E) Quantification of the mClover signal intensity in the indicated cell lines in interphase (D) and mitosis (E). Total cellular signal intensity was measured at a single focal plane that contained centrioles. Magenta-coloured dots indicate the cells for which an observer manually judged as “signals undetected”.

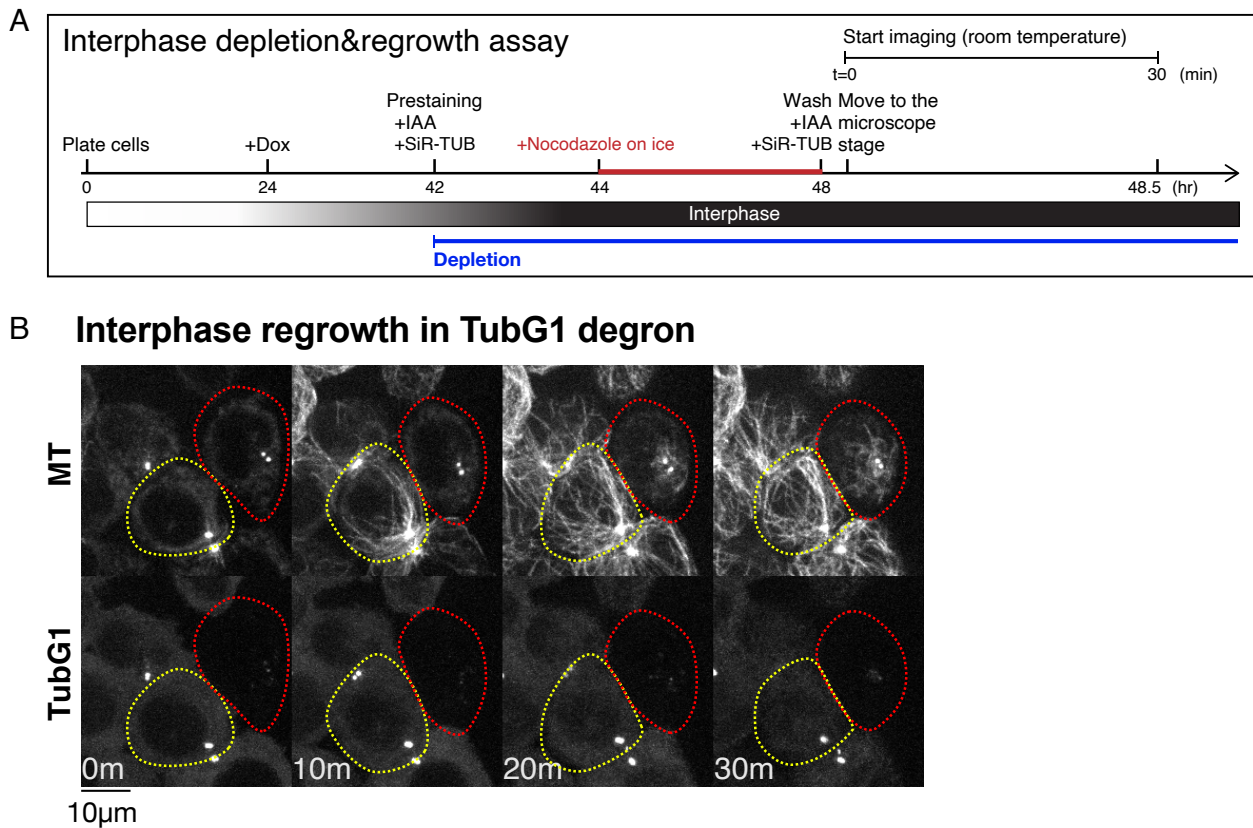

### Figure 3. MT nucleation without $\gamma$ -tubulin

(A) Flowchart of interphase MT depolymerisation-regrowth assay combined with auxin-induced degron. (B)  $\gamma$ -Tubulin-independent MT generation in interphase cells. MTs were depolymerised, except at the centrioles (0 min), followed by induction of regrowth (10–30 min). In the presence of  $\gamma$ -tubulin, MTs start to regrow within 10 min (yellow), whereas it took >10 min in the absence (red). The faint signals after TubG1 depletion represent autofluorescence.

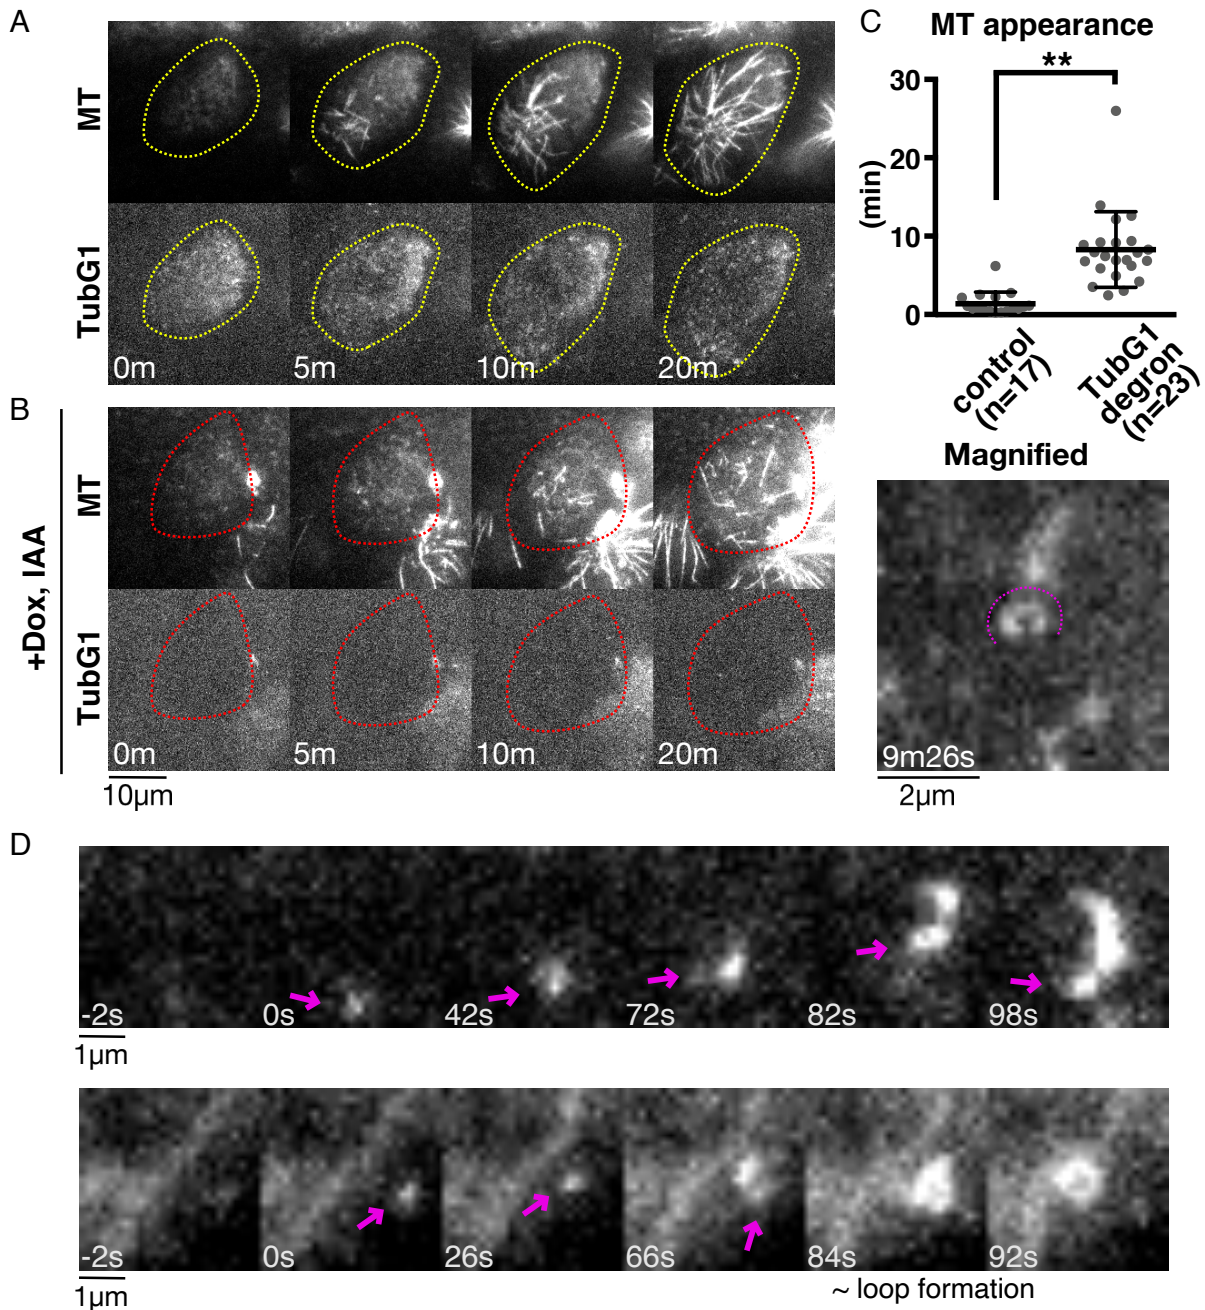

#### Figure 4. Visualisation of $\gamma$ -tubulin-independent MT nucleation

(A, B) MT nucleation in the presence (A) or absence (B) of  $\gamma$ -tubulin. Images were acquired every 2 s with oblique illumination fluorescence microscopy, which allows the detection of individual  $\gamma$ -tubulin complex. (C) Time of first MT appearance after drug washout in the presence ( $1.4 \pm 1.5$  min [SD]) or absence ( $8.3 \pm 4.8$  min) of  $\gamma$ -tubulin. MT was counted when the first SiR-tubulin signal stronger than the background was detected in three consecutive frames (i.e. 6 s).  $p < 0.0001$  (unpaired t-test with Welch's correction). (D) Two examples of nucleating MTs in the absence of  $\gamma$ -tubulin. The minus ends of nucleating MTs are marked with arrows. MT loop is formed in the second example (84–92 s).



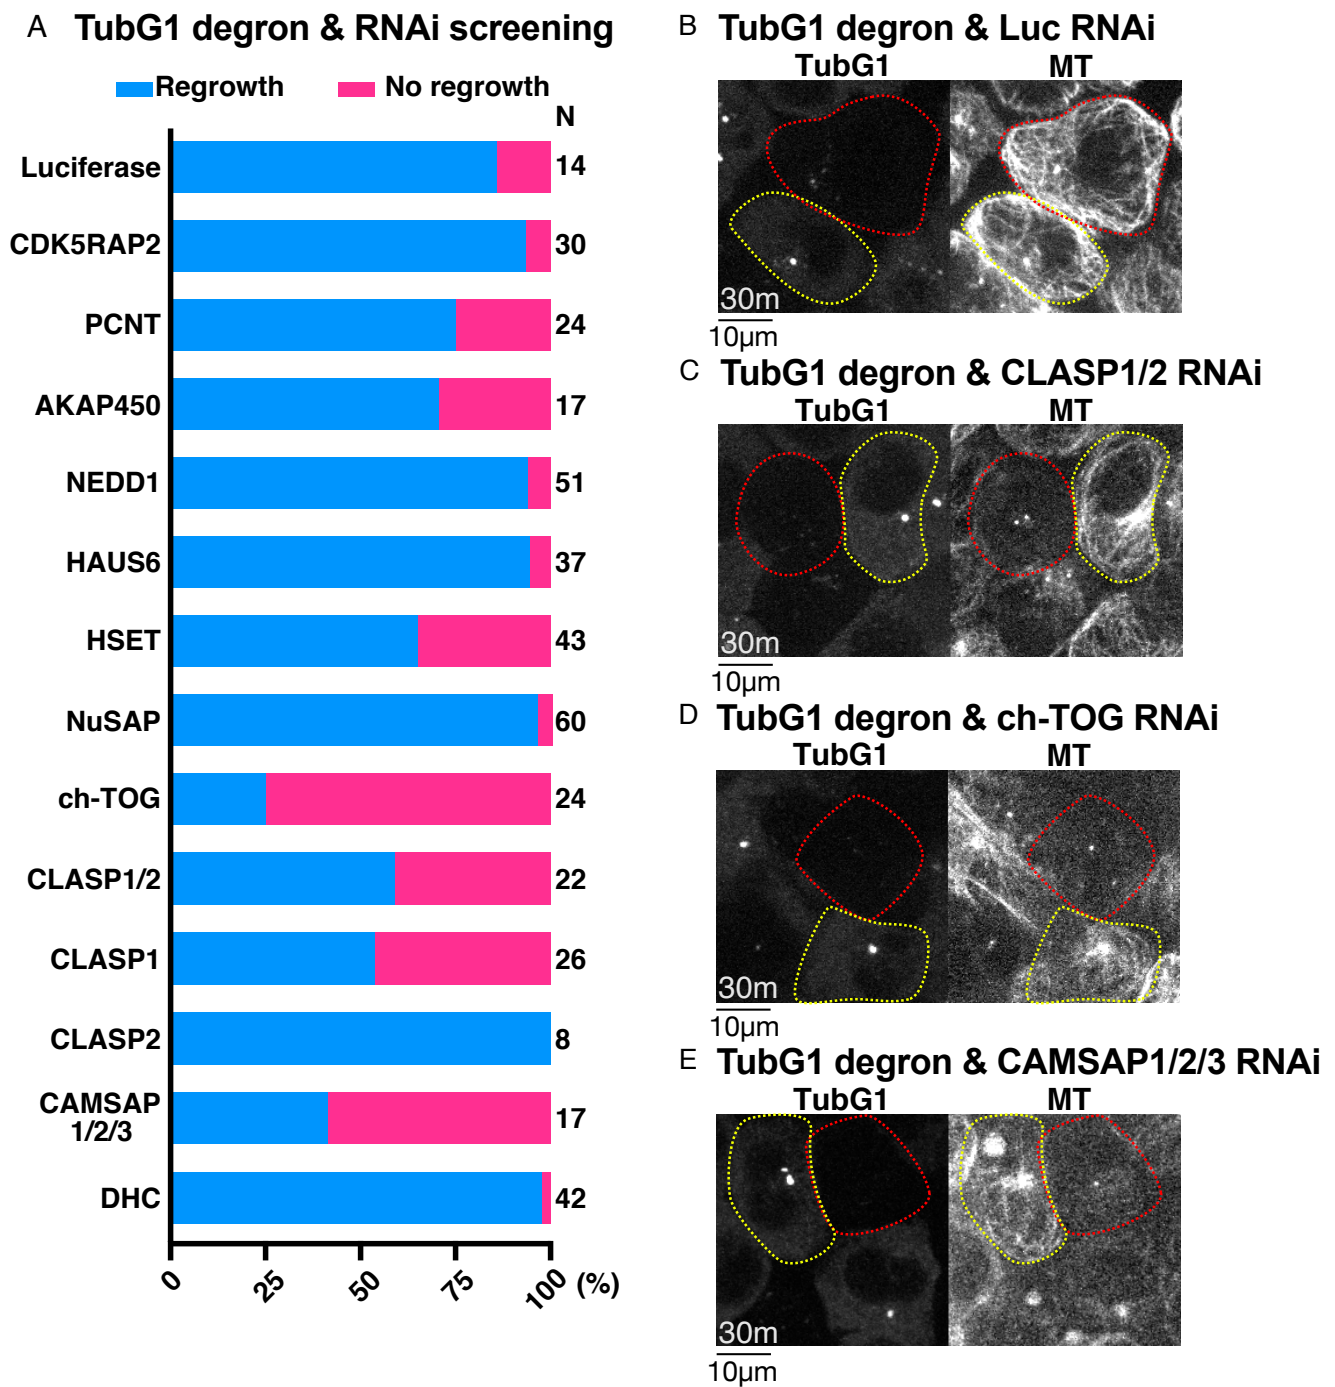

**Figure 5. ch-TOG, CLASP1, and CAMSAP1/2 are critical for  $\gamma$ -tubulin-independent MT generation in interphase**

(A) Frequency of MT regrowth after RNAi-mediated depletion of the indicated genes (30 min). RNAi cocktails targeted two or three genes simultaneously for CLASP or CAMSAP, respectively. Luciferase siRNA was used as a negative control. (B–E)  $\gamma$ -Tubulin degron was combined with RNAi of the indicated genes. Images were taken 30 min after nocodazole washout. Cells with  $\gamma$ -tubulin signals are indicated by yellow circles, whereas red-circled cells have no detectable  $\gamma$ -tubulin signals.

### A TubG1&ch-TOG degron

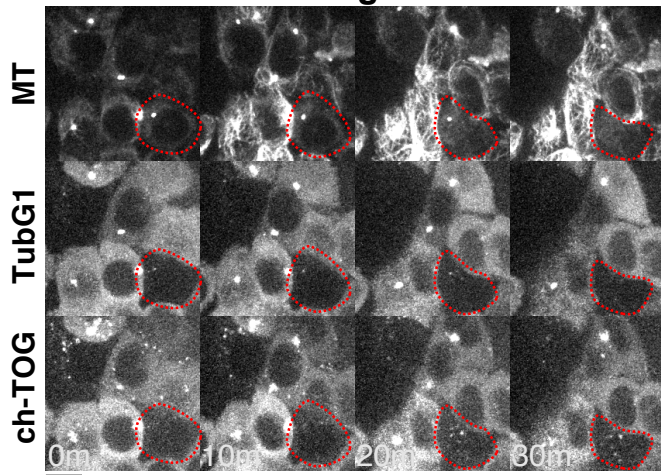

### B TubG1&CLASP1 degron

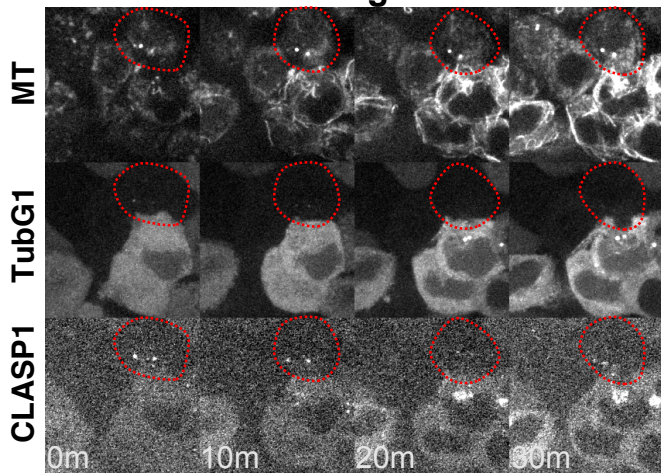

### C TubG1 degron & CAMSAP3KO & CAMSAP1/2 RNAi

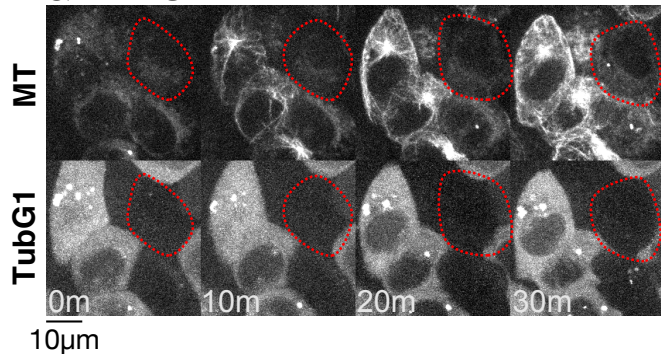

### D Interphase double degron or KO

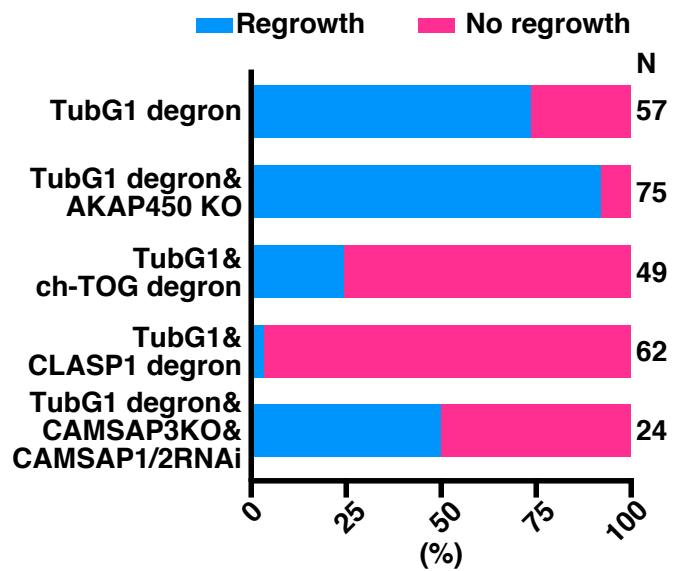

### E

#### SiR-tub signal in double degron cells

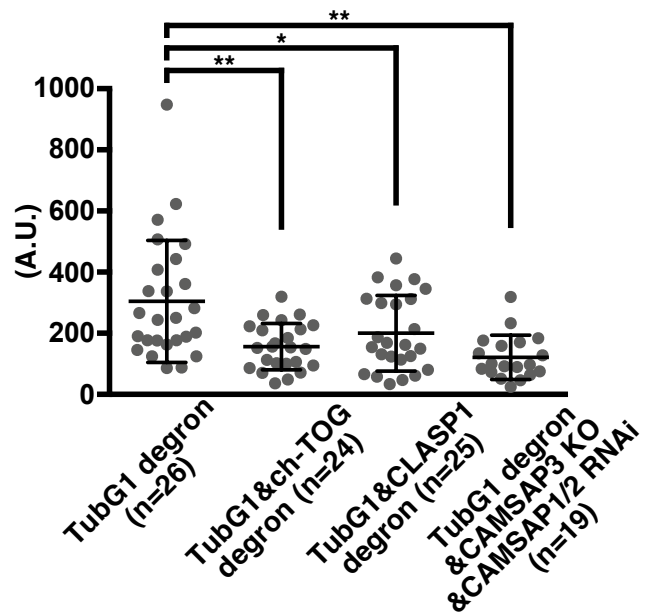

### F MT appearance (37°C)

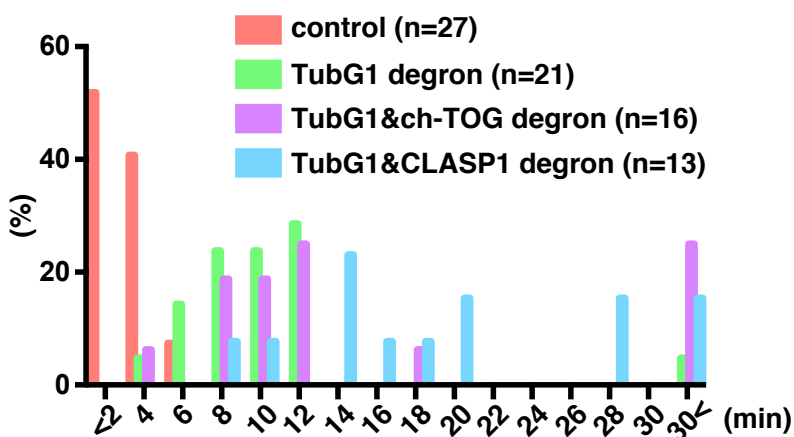

## Figure 6. CLASP1 promotes $\gamma$ -tubulin-independent MT generation

(A-C) Suppression of MT regrowth by double depletion of  $\gamma$ -tubulin and ch-TOG (A), CLASP1 (B), or CAMSAP1/2 (C, CAMSAP3 KO background) at 25°C. Depleted cells are marked in red circles, whereas the surrounding cells with  $\gamma$ -tubulin and MAPs acted as the internal controls. Bars, 10  $\mu$ m. (D, E) Frequency of MT appearance (D) and MT intensity (E) in the indicated lines (25°C, 30 min after nocodazole washout).  $p = 0.0009, 0.0313, <0.0001$  (one-way ANOVA, Tukey's multiple comparisons). (F) Time of MT appearance after nocodazole washout at 37°C in the indicated lines.

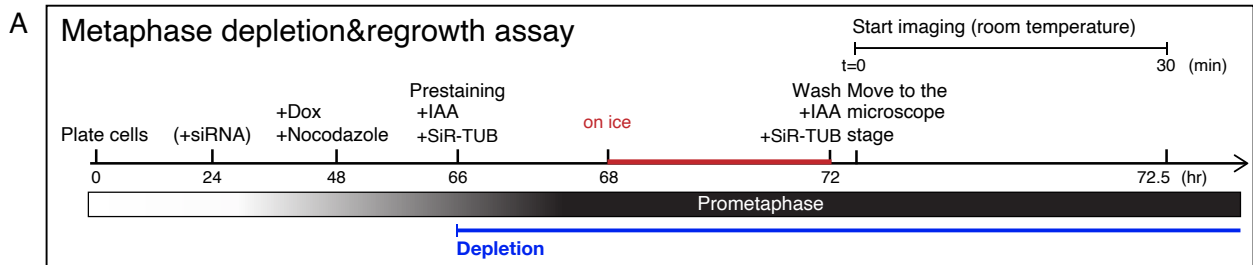

**B control**

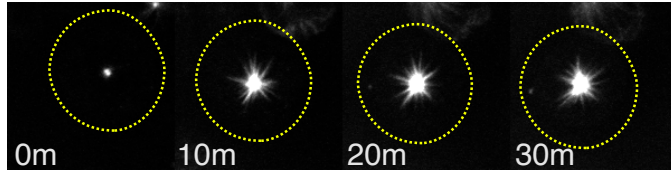

**TubG1 MT**

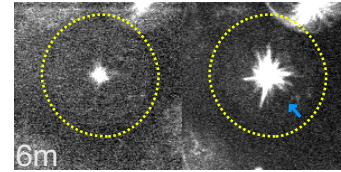

**C TubG1 degran**

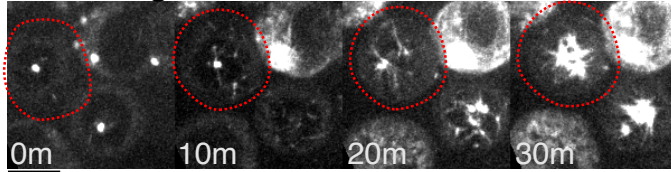

**TubG1 MT**

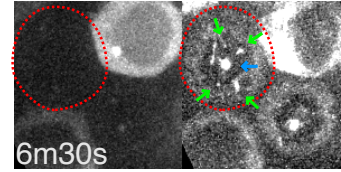

**D TubG1&ch-TOG degran**

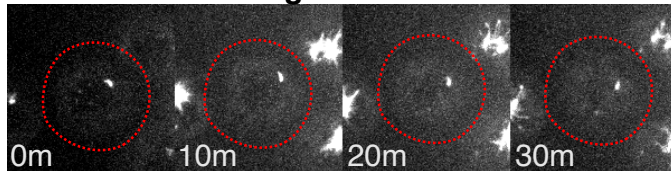

**TubG1 ch-TOG MT**

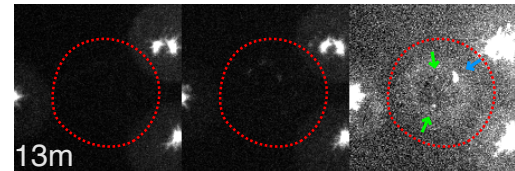

**E TubG1&CLASP1 degran**

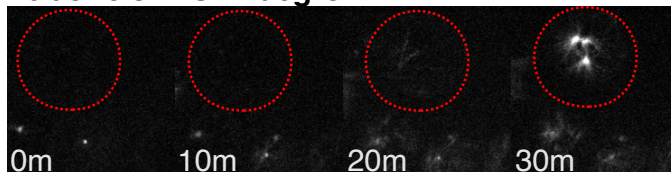

**TubG1 CLASP1 MT**

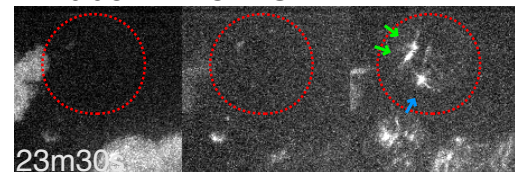

**F TubG1&TPX2 degran**

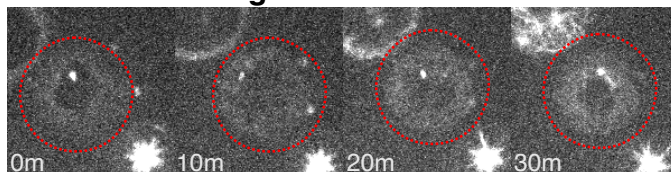

**TubG1 TPX2 MT**

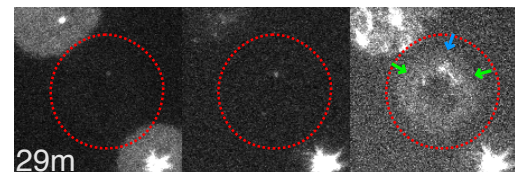

10µm

G

**de novo MTOC appearance**

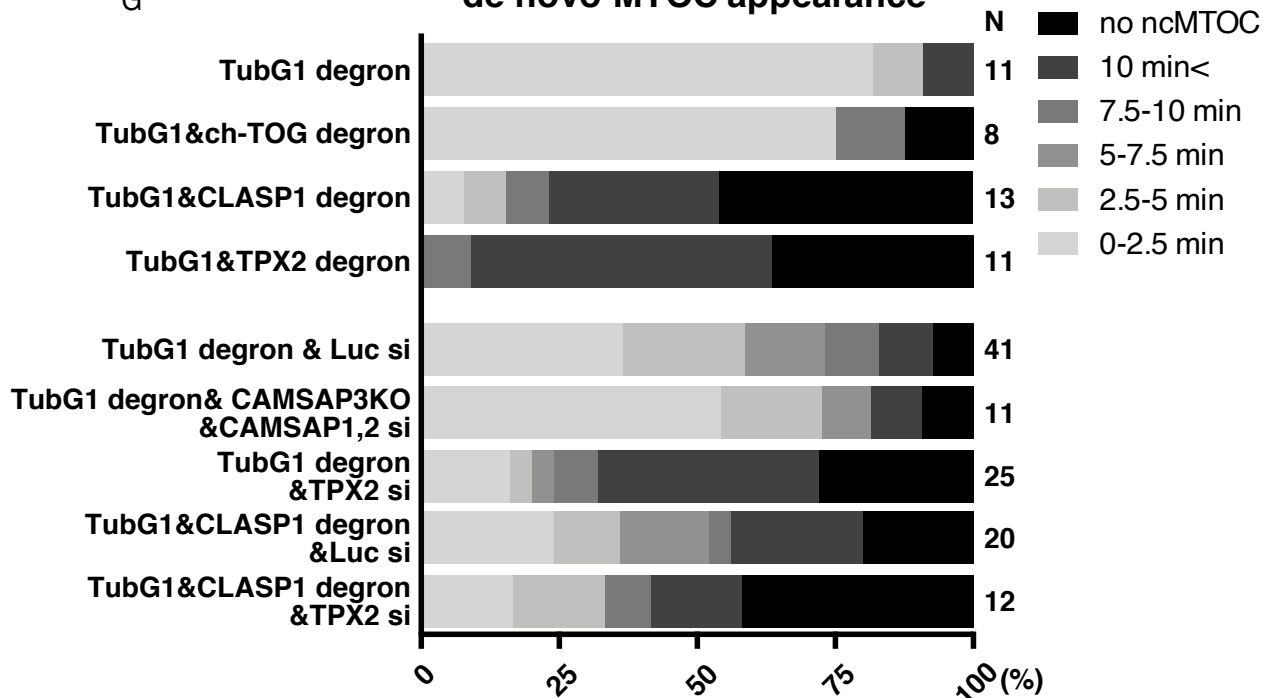

## **Figure 7. CLASP1 and TPX2 promote $\gamma$ -tubulin-independent MTOC formation in mitosis**

(A) Flowchart of MT regrowth assay in mitosis. (B–F) MT regrowth after drug washout in the indicated cell lines. The cells with undetectable levels of  $\gamma$ -tubulin and MAPs are marked in red circles, whereas the control cells are marked in yellow. Blue arrows on the right panel indicate the centriole, which retains MTs even after cold/drug treatment, whereas green arrows indicate ncMTOCs. Bars, 10  $\mu$ m. (G) Timing of ncMTOC formation after nocodazole washout in the indicated cell lines.

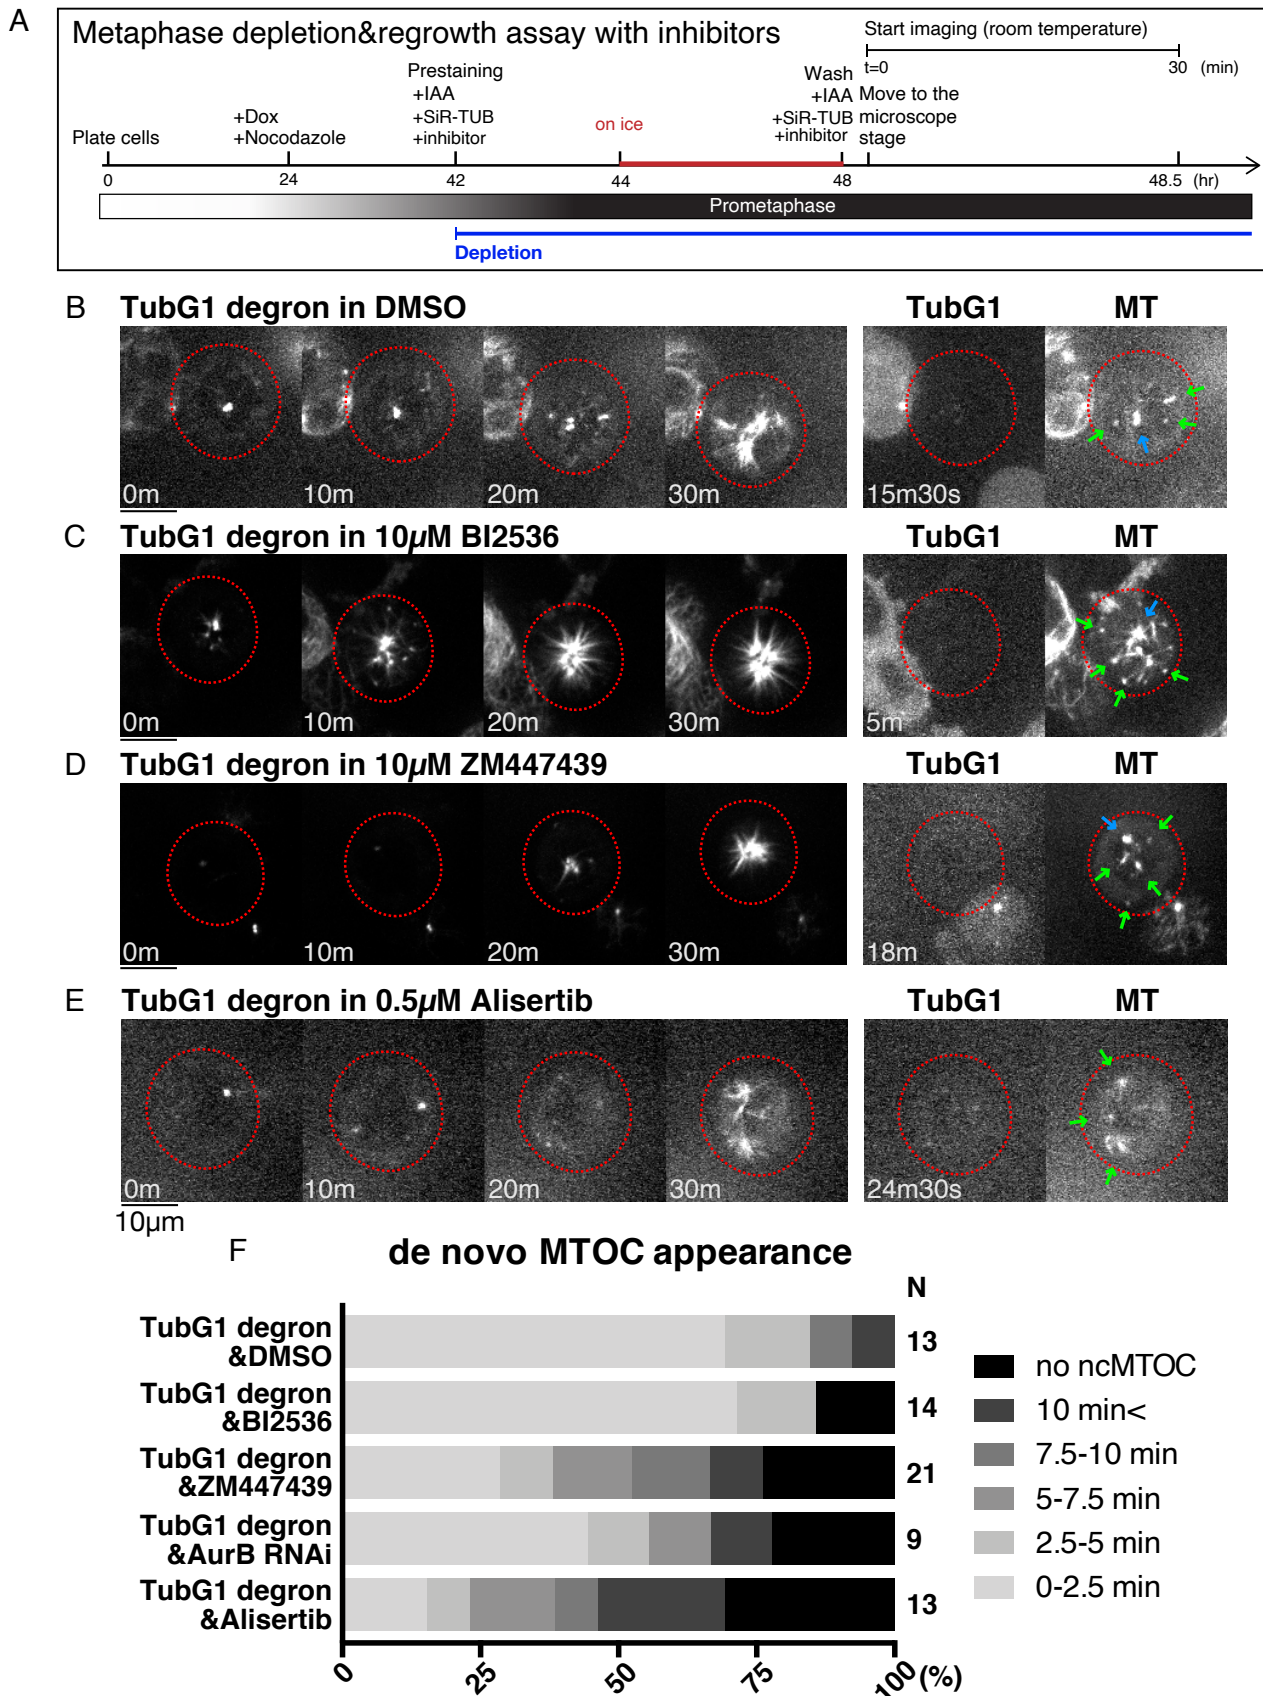

**Figure 8. Aurora kinases contribute to  $\gamma$ -tubulin-independent MTOC formation in mitosis**

(A) Flowchart of MT depolymerisation-regrowth assay in prometaphase combined with auxin-induced degran and drug treatment. (B–E) MT regrowth after drug washout in the indicated cell lines and treatment. The cells with undetectable levels of  $\gamma$ -tubulin are marked in red circles. Blue arrows on the right panel indicate the centriole, which retains MTs even after cold/drug treatment, whereas green arrows indicate non-centriolar MTOCs. Bars, 10  $\mu$ m. (F) Timing of ncMTOC formation after nocodazole washout in the indicated cell treatment.

## A TubG1 C-terminal tagging

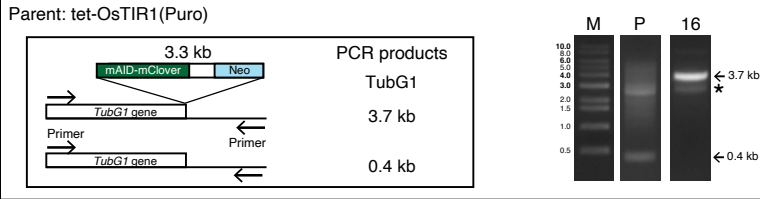

## B TubG2 knock out

Parent: tet-OsTIR1(puro) +TubG1-mAC(Neo)

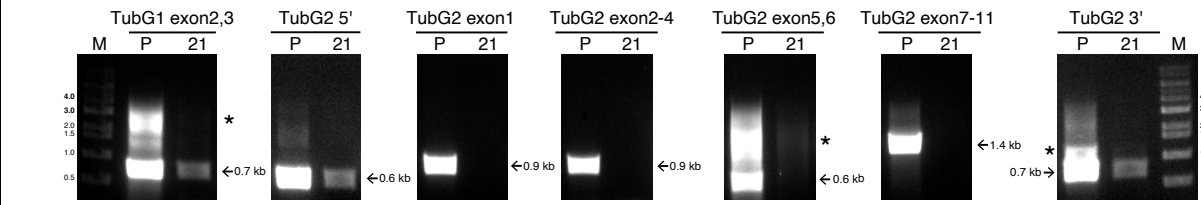

## C ch-TOG C-terminal tagging

Parent: tet-OsTIR1(Puro)+TubG1-mAC (Neo)+TubG2 KO (BSD)

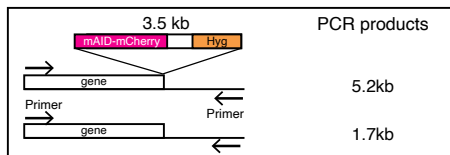

A: TubG1-mAC+TubG2 KO B: ch-TOG-mACH C: TubG1-mAC+TubG2 KO+ch-TOG-mAch D: TubG1-mAC+TubG2 KO+ch-TOG-mCh

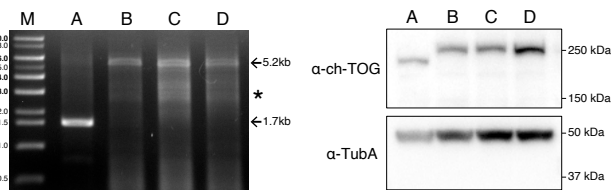

## D CLASP1 C-terminal tagging

Parent: tet-OsTIR1(Puro)+TubG1-mAC (Neo)+TubG2 KO (BSD)

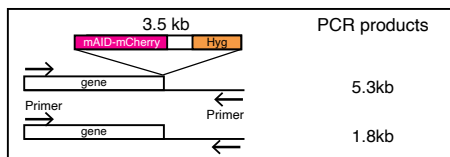

A: TubG1-mAC+TubG2 KO B: CLASP1-mACH C: TubG1-mAC+TubG2 KO+CLASP1-mACH

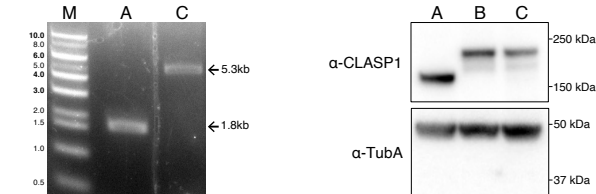

## E TPX2 N-terminal tagging

Parent: tet-OsTIR1(Puro)+TubG1-mAC (Neo)+TubG2 KO (BSD)

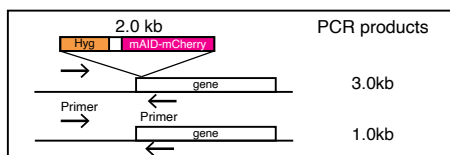

A: TubG1-mAC+TubG2 KO B: TPX2-mACH C: TubG1-mAC+TubG2 KO+TPX2-mACH D: TubG1-mAC+TubG2 KO+TPX2-mCh

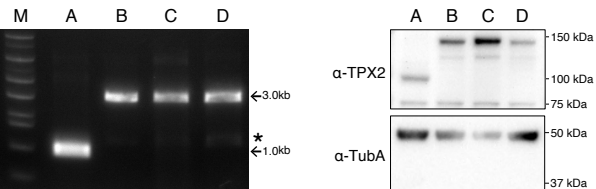

## F AKAP450 knock out

Parent: tet-OsTIR1(Puro)+TubG1-mAC (Neo)+TubG2 KO (BSD)

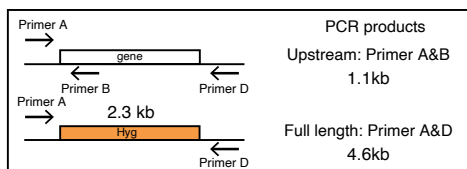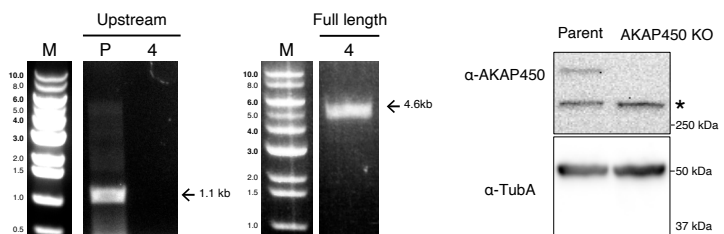

## G CAMSAP3 knock out

Parent: tet-OsTIR1(Puro)+TubG1-mAC (Neo)+TubG2 KO (BSD)

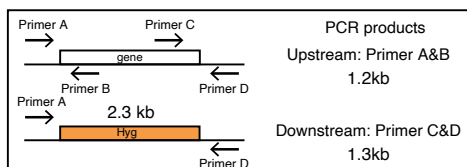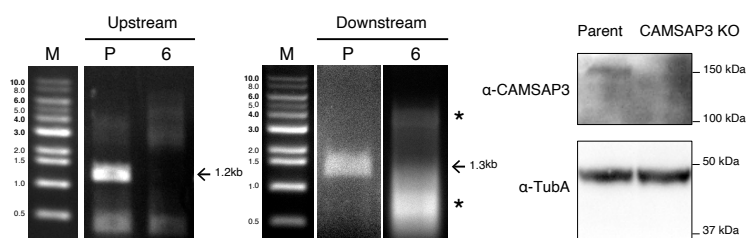

## Figure S1. Construction and confirmation of the cell lines used in this study

Gene targeting strategy, PCR strategy, PCR results, and immunoblotting results are shown for the cell lines used in this study. 'P' marks at the top of the panels represent parental lines, whereas the numbers (e.g. '4', '16') indicate the line identification numbers. Asterisks indicate non-specific bands. (A) mAID-mClover ('mAC') tagging to TubG1. PCR amplified a 3.7-kb fragment in the tagged line. Immunoblotting results are shown in Fig. 1A. (B) Confirmation of TubG2 KO by PCR. The lack of bands derived from exons was confirmed in the KO line. The TubG1 exon and TubG2 UTR regions were amplified as positive controls. (C) mAID-mCherry ('mACh') or mCherry ('mCh') tagging to chTOG. PCR amplified a 5.2-kb fragment in the tagged line. Immunoblotting results are shown on the right; the band is shifted upwards with the tag. (D) mAID-mCherry ('mACh') tagging to CLASP1. PCR amplified a 5.3-kb fragment in the tagged line. Immunoblotting results are shown on the right; the band is shifted upwards with the tag. (E) mAID-mCherry ('mACh') or mCherry ('mCh') tagging to TPX2. PCR amplified a 3.0-kb fragment in the tagged line. Immunoblotting results are shown on the right; the band is shifted upwards with the tag. (F) PCR and immunoblotting confirmation of AKAP450 KO cells. DNA amplification was not observed when a primer targeting an exon was used for the KO line, whereas the hygromycin cassette was amplified with the primers designed at UTRs (this primer set did not amplify very long AKAP450 genes in the parental line). Immunoblotting showed a specific >250 kD band only in the parental line. (G) PCR and immunoblotting confirmation of CAMSAP3 KO. DNA amplification was not observed when a primer targeting an exon was used for the KO line. Immunoblotting showed a specific ~150 kD band only in the parental line.



### A Spindle formation st 25°C

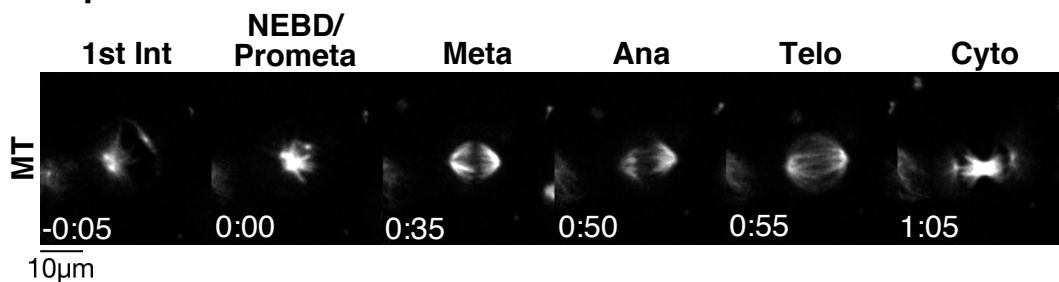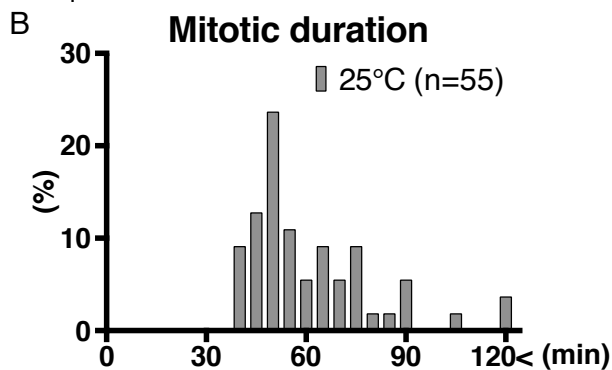

### C TubG1-mAC + ch-TOG-mCh

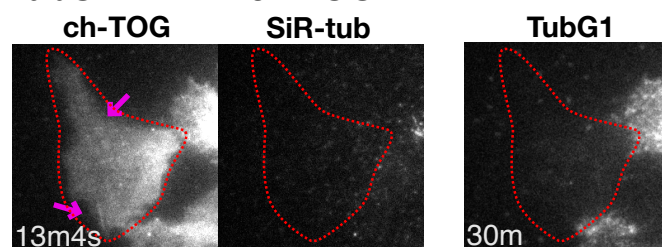

#### Magnified ch-TOG

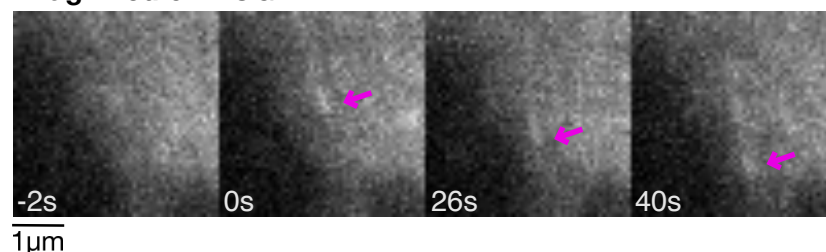

### D MT growth speed

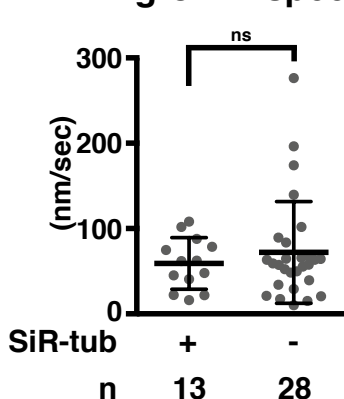

### E MT appearance

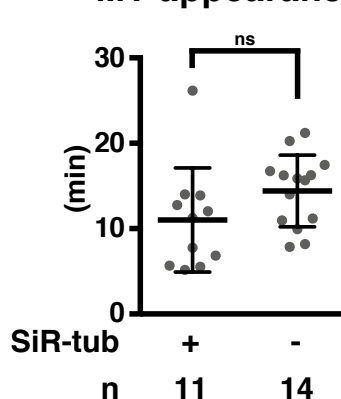

### Figure S2. Validation of MT regrowth assay

(A) Mitosis of HCT116 cell line at 25 °C. Time 0 corresponds to NEBD. (B) Mitotic duration at 25 °C (NEBD to anaphase onset). (C) MT nucleation in the absence of  $\gamma$ -tubulin, without SiR-tubulin staining, in interphase. The cells with undetectable levels of  $\gamma$ -tubulin are marked in red circles. MTs were visualised using ch-TOG-mCherry (arrows). (D, E) MT dynamics of  $\gamma$ -tubulin-depleted cells based on ch-TOG-mCherry signals with or without SiR-tubulin staining. MT growth rate was determined based on kymographs of ch-TOG-mCherry. Statistical evaluation was performed using unpaired t-test with Welch's correction ( $p = 0.3644, 0.1315$ ).

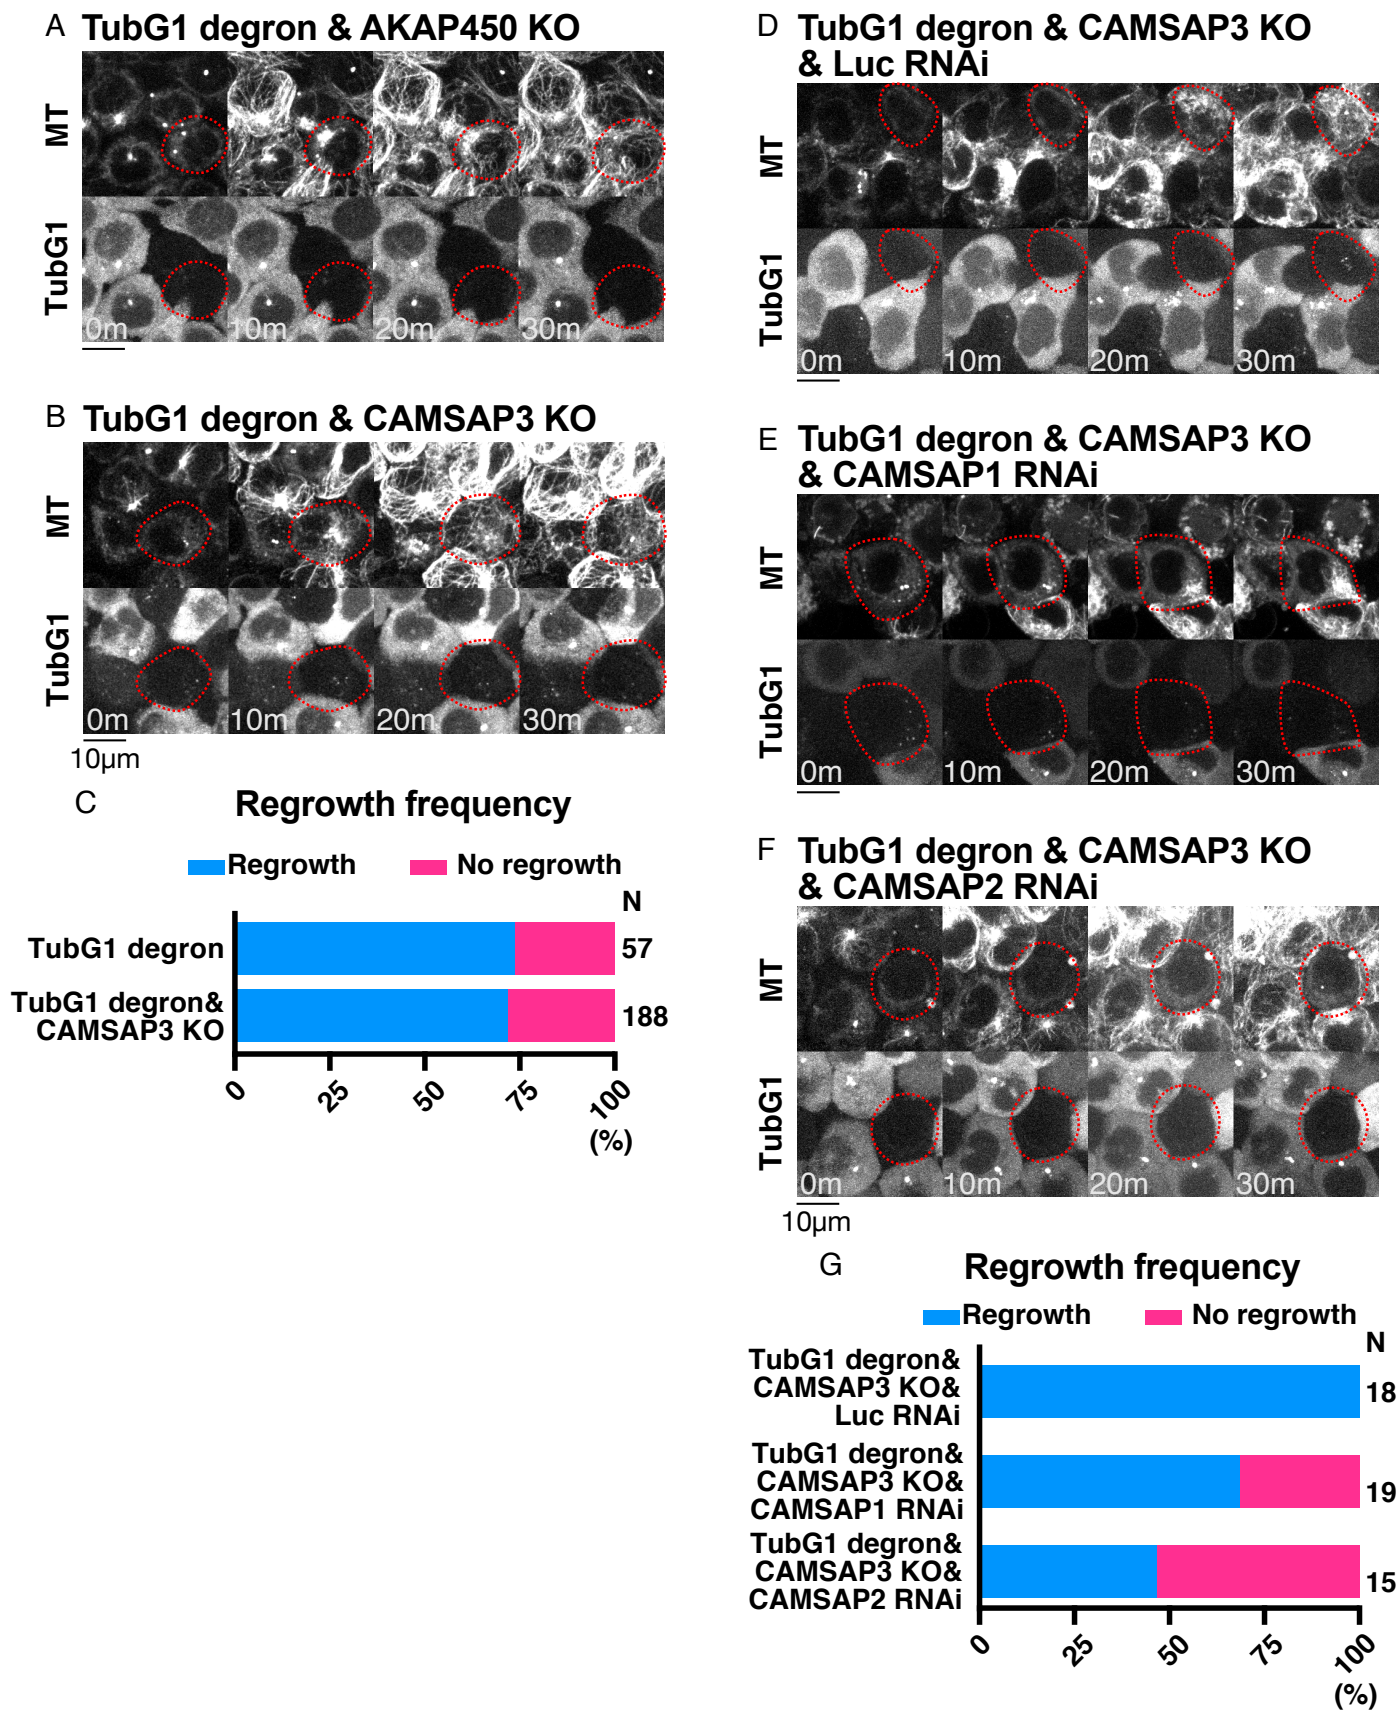

**Figure S3. Additional data on MT regrowth ability in interphase cells**

(A–B, D–F) MT regrowth in various lines. The cells marked in red circles show no detectable  $\gamma$ -tubulin signals. (C, G) Frequency of MT regrowth. MT appearance was assessed 30 min after nocodazole washout. The TubG1 degron data in (C) are the duplicates of Fig. 6D.

**A TubG1-mAC + ch-TOG-mCh**

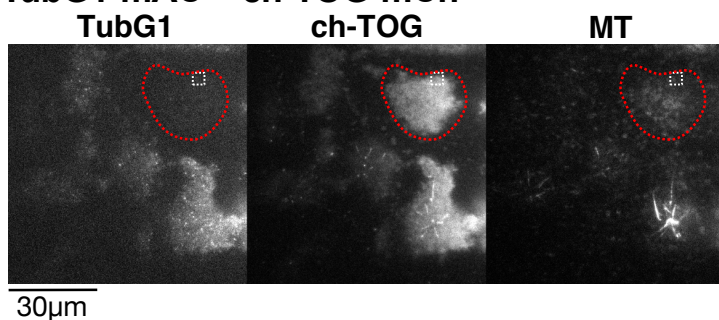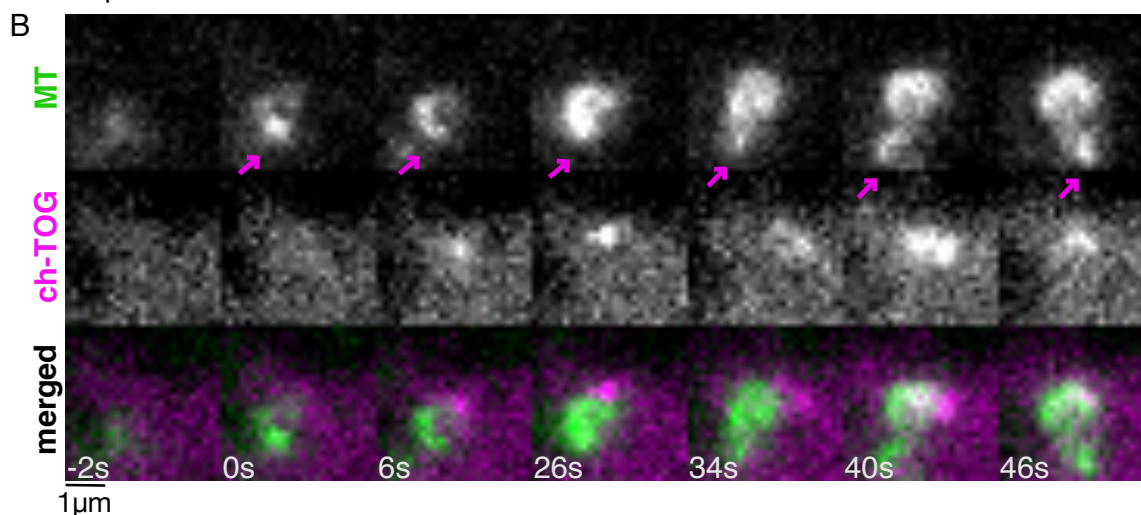

**C TubG1-mAC + CLASP1-mCh**

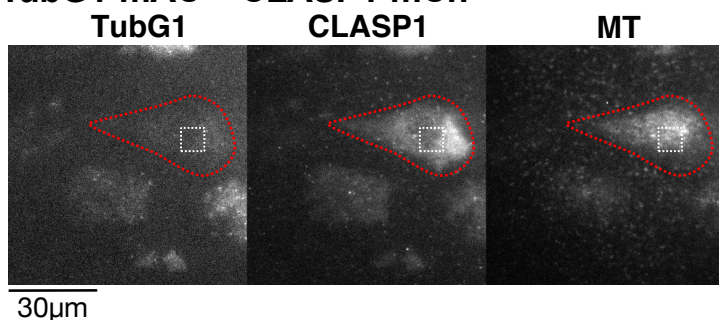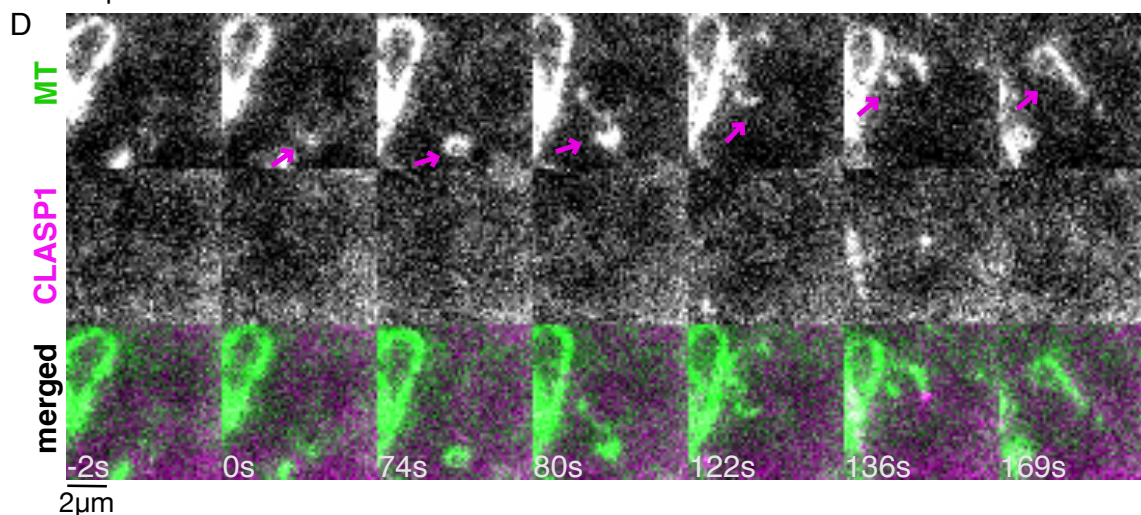

**Figure S4. ch-TOG and CLASP1 localisation during  $\gamma$ -tubulin-independent MT nucleation in the interphase cytoplasm**

Oblique illumination fluorescence microscopy of TubG1-mAID-mClover, ch-TOG-mCherry (or CLASP1-mCherry), and SiR-tubulin. Three-colour images were acquired to show  $\gamma$ -tubulin depletion in the first frame (A, C), followed by two-colour imaging every 2 s (B, D). A part of the cytoplasm (boxed in A, C) is magnified to show a nucleation event (B, D). Cells marked in red circles showed no detectable  $\gamma$ -tubulin signals.

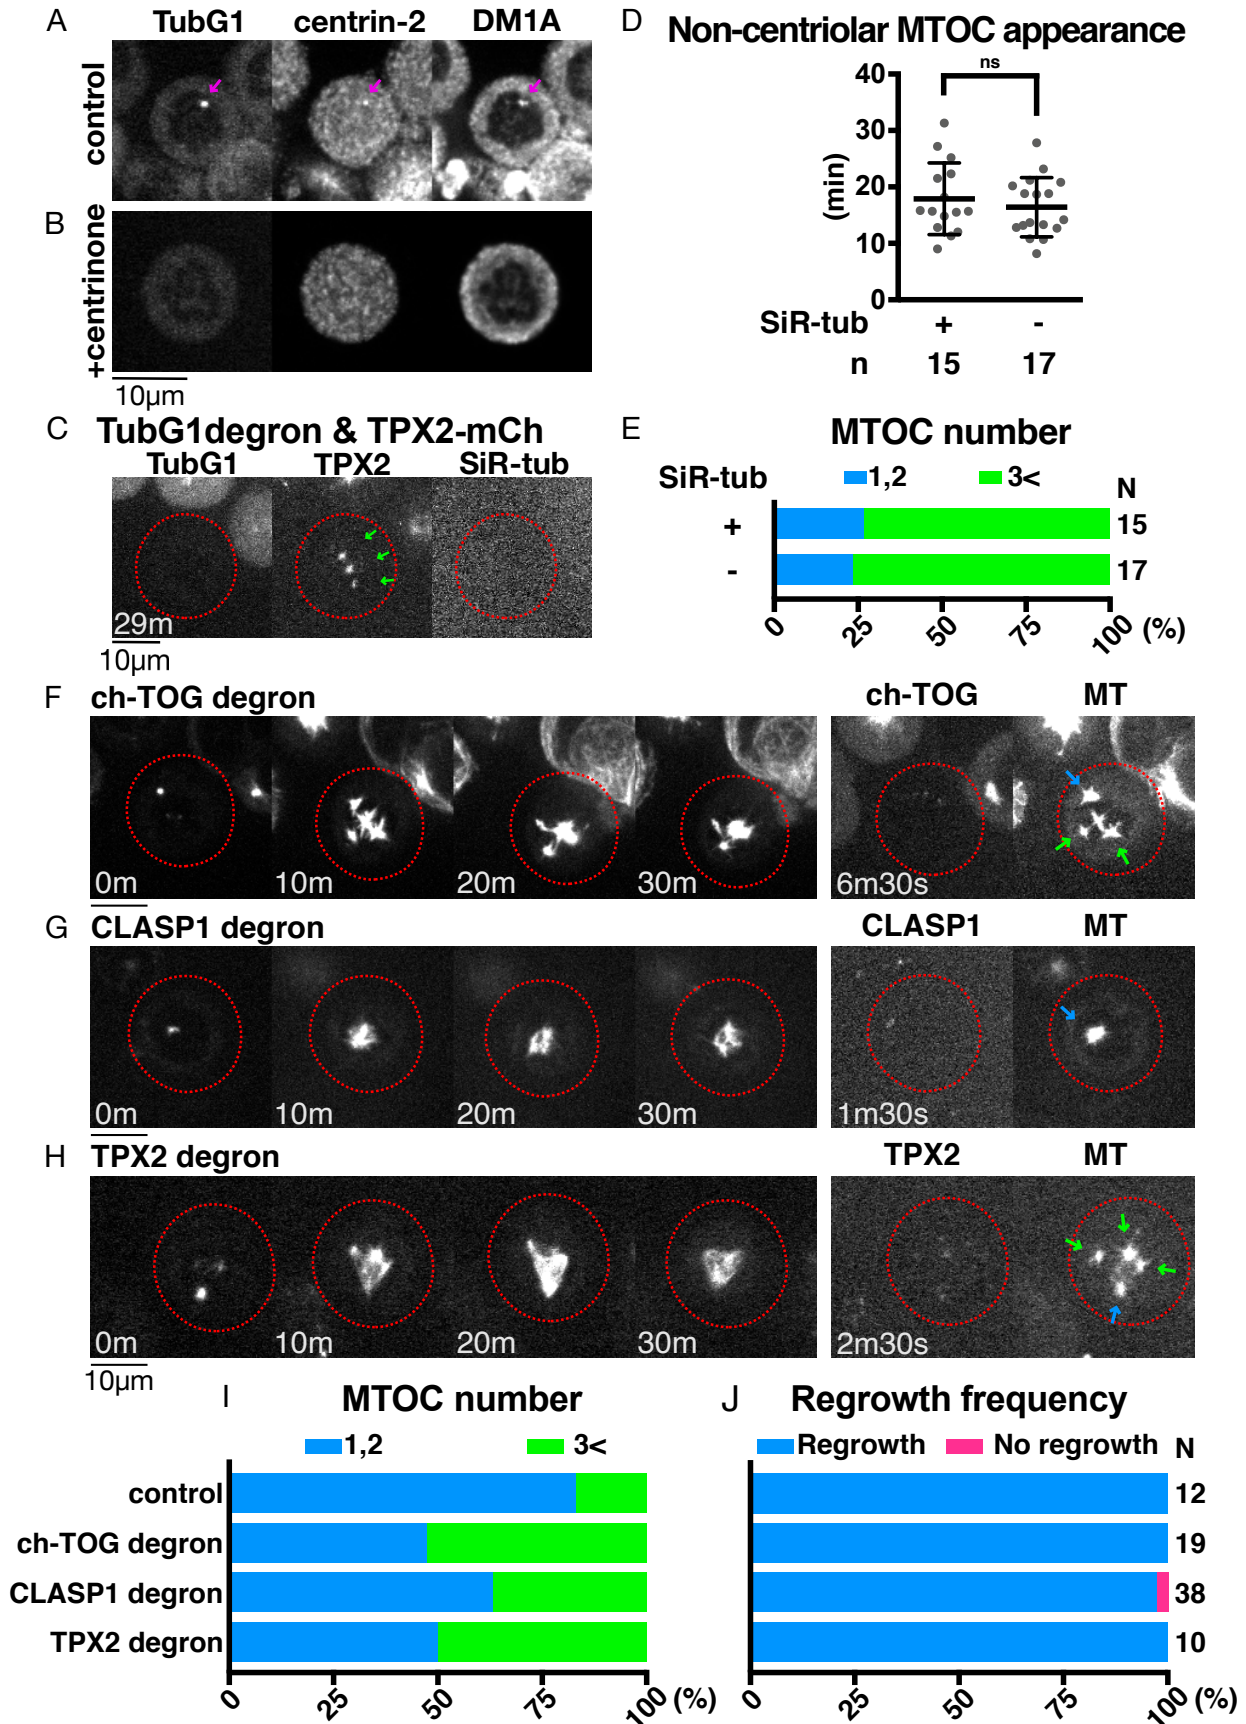

### Figure S5. Additional data on MTOC formation and MT regrowth in mitosis

(A, B) Centriolar MTs remain even after rigorous MT depolymerisation with nocodazole (arrows). (C) MTOC formation in the absence of  $\gamma$ -tubulin, with or without SiR-tubulin in mitosis. The cells with undetectable levels of  $\gamma$ -tubulin are marked in red circles. Green arrows indicate non-centriolar MTOCs. TPX2-mCherry was used to visualise MTs. (D) The time of new MTOC appearance after nocodazole washout in the absence of  $\gamma$ -tubulin with or without SiR-tubulin staining ( $18 \pm 6$  min,  $16 \pm 5$  min,  $p = 0.483$  (unpaired t-test with Welch's correction)). (E) Total MTOC numbers did not change with or without SiR-tubulin staining. (F–H) MT regrowth after ch-TOG, CLASP1, or TPX2 degraon treatment. Red circles indicate the cells with undetectable levels of proteins. Note that  $\gamma$ -tubulin is intact in these lines. Bars, 10  $\mu$ m. (I, J) Total MTOC numbers per cell and the frequency of cells with MTs at 30 min after nocodazole washout.
